# Supplementary material for: Evaluation of rabi season sesame productivity from graded nutrient doses and tillage regimes in rice fallows of southern plateau and hills region of the Indian sub-continent
Source: PeerJ. 2024 Sep 30;12:e17867. doi: 10.7717/peerj.17867 (PMC11448658; doi:10.7717/peerj.17867)
Supplement: Supplemental Information 1 [file peerj-12-17867-s001.xlsx]

## Sheet: 2020
	Real Time Daily Weather Data 2020
Week	Date	Temp 0C				RH (%)		W.V	SS	Eva	Radiation	Rainfall	RD	Since
		Max 0C		Min 0C
		I	II	I	II	I	II	(km/h)	Hours	mm	cal/ cm2	(mm)
1	2020-01-01	29	29.4	21.4	21.4	91	89	0	3.8	1	294.55	0	0	0
	2020-01-02	29	29.4	21.4	21.4	100	85	0	5.3	1	266.7	0	0	0
	2020-01-03	29.4	30	21	21	100	85	0	8	0.4	183.15	0	0	0
	2020-01-04	30	29	21.4	21.4	100	85	0	5	1	294.55	0	0	0
	2020-01-05	29.4	29.4	21	21	95	89	0	3	0.5	573.05	0	0	0
	2020-01-06	30	29.4	21.4	21.4	100	82	0	7	1.6	489.5	0	0	0
	2020-01-07	30	30	22	22	96	89	4.5	5.9	1.8	517.32	5.8	1	5.8
		29.5429	29.5143	21.3714	21.3714	97.4286	86.2857	0.642857	5.42857	1.04286	374.117	5.8	1	0.828571
2	2020-01-08	30.4	29.4	21.4	21.4	100	85	0	4.5	1.2	573.05	2.2	1	8
	2020-01-09	30	29.4	19.4	19.4	96	97	0	7	2	517.32	0	0	8
	2020-01-10	30	29	19.4	19.4	94	85	0	7	2	545.2	0	0	8
	2020-01-11	29	30.4	19.4	19.4	94	92	0	8	2.2	573.05	0	0	8
	2020-01-12	30.4	29.4	19.4	19.4	100	92	0	6	1.6	489.5	0	0	8
	2020-01-13	30	29.4	20.4	20.4	100	100	0	5.5	1.7	461.65	0	0	8
	2020-01-14	30	29.4	18	18	100	82	0	6.3	1.1	489.5	0	0	8
		29.9714	29.4857	19.6286	19.6286	97.7143	90.4286	0	6.32857	1.68571	521.324	2.2	1	8
3	2020-01-15	29.4	29.4	17.4	17.4	91	85	0	7.7	2.2	573.05	0	0	8
	2020-01-16	29.4	29	17.4	17.4	100	85	0	8	1.7	517.35	0	0	8
	2020-01-17	29.4	27	17.4	17.4	91	85	0	6	1.6	589.5	0	0	8
	2020-01-18	30.4	29.4	20.4	20.4	100	85	0	7	0.2	517.35	10.2	1	18.2
	2020-01-19	30	29.4	17	17	91	92	0	6	0.7	433.8	0	0	18.2
	2020-01-20	30.4	31.4	17.4	17.4	95	85	0	8	2	461.65	0	0	18.2
	2020-01-21	31.4	30	20.4	20.4	91	97	0	6	2	742.93	0	0	18.2
		30.0571	29.3714	18.2	18.2	94.1429	87.7143	0	6.95714	1.48571	547.947	10.2	1	13.8286
4	2020-01-22	30	29.4	17	17	95	95	0	7	1.9	573.05	0	0	18.2
	2020-01-23	30	30.4	18	18	91	88	0	6	1.4	545.2	0	0	18.2
	2020-01-24	30	31	18	18	94	95	0	7	2.2	545.2	0	0	18.2
	2020-01-25	30	30.4	17	17	95	89	0	7	2.7	600.9	0	0	18.2
	2020-01-26	30.4	29	17.4	17.4	96	95	0	8	2.2	600.9	0	0	18.2
	2020-01-27	31	31	17	17	96	85	0	8.3	1.6	628.75	0	0	18.2
	2020-01-28	32	33	18.4	18.4	100	79	0	8	3	745.72	0	0	18.2
		30.4857	30.6	17.5429	17.5429	95.2857	89.4286	0	7.32857	2.14286	605.674	0	0	18.2
5	2020-01-29	33	33	19	19	96	80	0	8.3	3.7	740.15	0	0	18.2
	2020-01-30	33	32.4	18.4	18.4	100	85	0	7.3	3	573.05	0	0	18.2
	2020-01-31	33.4	32.4	19	19	94	80	0	9	3	600.9	0	0	18.2
	2020-02-01	32.4	32.4	19.4	19.4	94	85	0.1	8	4	628.75	0	0	18.4
	2020-02-02	32.4	33	18.4	18.4	96	88	0.2	8	3.4	712.3	0	0	18.4
	2020-02-03	33	31	19	19	94	85	0	7.5	3.6	740.15	0	0	18.4
	2020-02-04	31	31	19.4	19.4	96	92	0	8	4	684.45	0	0	18.4
		32.6	32.1714	18.9429	18.9429	95.7143	85	0.0428571	8.01429	3.52857	668.536	0	0	18.3143
6	2020-02-05	31	31	20.4	20.4	100	88	0.1	8	3.5	684.45	0	0	18.4
	2020-02-06	31.4	31.4	17	17	100	87	0.1	7	4.4	712.3	0	0	18.4
	2020-02-07	31.4	33	18	18	94	85	0.1	9.5	4	573.05	0	0	18.4
	2020-02-08	33	33	18.4	18.4	94	88	0.1	8.8	4	712.3	0	0	18.4
	2020-02-09	33.4	32	18.4	18.4	96	92	0.1	7	5.2	684.45	0	0	18.4
	2020-02-10	32.4	32	18.4	18.4	96	83	0.2	7	4.2	740.15	0	0	18.4
	2020-02-11	32	31.4	21	21	96	88	1.2	7.8	6.1	740.15	0	0	18.4
		32.0857	31.9714	18.8	18.8	96.5714	87.2857	0.271429	7.87143	4.48571	692.407	0	0	18.4
7	2020-02-12	32	31.4	21.4	21.4	95	90	0.4	8.5	5.2	717.87	0	0	18.4
	2020-02-13	32.4	32.4	21.4	21.4	95	85	0.6	8	5.3	692.8	0	0	18.4
	2020-02-14	32.4	32.4	20	20	94	85	0	6.8	5	740.15	0	0	18.4
	2020-02-15	32.4	33	18.4	18.4	95	95	0	7	5.1	712.3	0	0	18.4
	2020-02-16	33	32.4	19	19	95	95	0	8	4	712.3	0	0	18.4
	2020-02-17	32	`32.0	18.4	18.4	100	95	0	8.3	6.1	740.15	0	0	18.4
	2020-02-18	33	31.4	17	17	100	94	0	9.3	4.6	740.15	0	0	18.4
		32.4571	32.1667	19.3714	19.3714	96.2857	91.2857	0.142857	7.98571	5.04286	722.246	0	0	18.4
8	2020-02-19	31.4	32	18	18	100	92	0	8.3	5.2	712.3	0	0	18.4
	2020-02-20	32	31.4	18	18	94	93	0	7	4.6	723.44	0	0	18.4
	2020-02-21	31.4	31.4	19.4	19.4	94	85	0	9.6	5.3	740.15	0	0	18.4
	2020-02-22	32	32	20	20	94	95	0.3	6.3	5.2	712.3	0	0	18.4
	2020-02-23	32	31	19	19	94	95	0.3	6.4	5.2	684.45	0	0	18.4
	2020-02-24	31.4	33	20	20	96	82	0	6.2	4.4	740.15	0	0	18.4
	2020-02-25	33	33.4	20.4	20.4	96	79	0	9	5.6	745.72	0	0	18.2
		31.8857	32.0286	19.2571	19.2571	95.4286	88.7143	0.0857143	7.54286	5.07143	722.644	0	0	18.3714
9	2020-02-26	33.4	32.4	20.4	20.4	95	85	0	9.3	5.8	742.93	0	0	18.2
	2020-02-27	33	33	19.4	19.4	96	85	0	9	5.5	717.87	0	0	18.2
	2020-02-28	33	33	21.4	21.4	96	88	0.1	8.5	5	745.72	0	0	18.2
	2020-02-29	33	32	20.4	20.4	95	95	0	8	4.4	740.15	0	0	18.2
	2020-03-01	32	32.4	20.4	20.4	95	85	0	8.5	5.2	740.15	0	0	18.2
	2020-03-02	32.4	33	20	20	94	88	0	7.6	5.2	720.65	0	0	18.2
	2020-03-03	33	34	20	20	96	85	0	7.4	5.2	729.01	0	0	18.2
		32.8286	32.8286	20.2857	20.2857	95.2857	87.2857	0.0142857	8.32857	5.18571	733.783	0	0	18.2
10	2020-03-04	34	35.4	20	20	95	62	0.1	6.5	4.6	740.15	0	0	18.2
	2020-03-05	35.5	35	20	20	95	63	0	7.4	5.4	742.93	0	0	18.2
	2020-03-06	35	34.4	22.4	22.4	96	64	0.1	6.2	4.6	740.15	0	0	18.2
	2020-03-07	34.4	34	23	23	92	62	0	7	5	740.15	0	0	18.2
	2020-03-08	34	34	22.4	22.4	95	65	0.3	6.3	5.4	712.3	0	0	18.2
	2020-03-09	34.2	33	22	22	95	58	0.4	8.7	4.6	726.22	0	0	18.2
	2020-03-10	34	34.4	20.4	20.4	96	49	0	7.8	5	706.73	0	0	18.2
		34.4429	34.3143	21.4571	21.4571	94.8571	60.4286	0.128571	7.12857	4.94286	729.804	0	0	18.2
11	2020-03-11	34.4	35	19.4	19.4	95	49	0	9	4.4	726.22	0	0	18.2
	2020-03-12	35	34.4	20.4	20.4	96	53	0	9.8	4.2	720.65	0	0	18.2
	2020-03-13	34.4	34	20.4	20.4	95	53	0	5.8	4.4	740.15	0	0	18.2
	2020-03-14	34	33.4	21.4	21.4	95	59	0	8.5	5.2	734.58	0	0	18.2
	2020-03-15	34	34	21.4	21.4	96	53	0	9	5.4	684.45	0	0	18.2
	2020-03-16	34.2	34	22	22	95	53	0	7.5	4.6	712.3	0	0	18.2
	2020-03-17	34	34	23	23	93	53	0	7.6	6.4	662.17	0	0	18.2
		34.2857	34.1143	21.1429	21.1429	95	53.2857	0	8.17143	4.94286	711.503	0	0	18.2
12	2020-03-18	34.2	34.4	22.4	22.4	96	56	0	8.5	5.8	684.45	0	0	18.2
	2020-03-19	34.4	34.4	22	22	100	51	0	7.5	5.2	740.15	0	0	18.2
	2020-03-20	34.4	36	20.4	20.4	96	47	0	7.5	5	684.45	0	0	18.2
	2020-03-21	36	35.4	22.4	22.4	95	52	1.2	8.2	5.6	684.45	0	0	18.2
	2020-03-22	35.4	35.4	22.4	22.4	95	45	2.3	7.5	5	695.59	0	0	18.2
	2020-03-23	35.4	34.4	23.4	23.4	92	53	2.2	7.3	6	706.73	0	0	18.2
	2020-03-24	34.4	34	22	22	91	48	2.5	6.1	5	712.3	0	0	18.2
		34.8857	34.8571	22.1429	22.1429	95	50.2857	1.17143	7.51429	5.37143	701.16	0	0	18.2
13	2020-03-25	34	34	21.4	21.4	95	51	3.1	7.8	5.5	717.87	0	0	18.2
	2020-03-26	34	33.8	22.4	22.4	96	52	3	8.3	5	673.31	0	0	18.2
	2020-03-27	34	34	22.6	22.6	93	54	3.8	9.1	5.4	712.3	0	0	18.2
	2020-03-28	34	34.8	21	21	96	54	3.7	7.1	5.2	740.15	0	0	18.2
	2020-03-29	34.8	34.8	20.6	20.6	95	51	2.9	10	5.6	734.58	0	0	18.2
	2020-03-30	34.8	34.2	20.2	20.2	96	49	2	9.8	5	734.58	0	0	18.2
	2020-03-31	34.2	34.2	21.8	21.8	91	53	3.1	10.1	5.2	717.87	0	0	18.2
		34.2571	34.2571	21.4286	21.4286	94.5714	52	3.08571	8.88571	5.27143	718.666	0	0	18.2
14	2020-04-01	34.2	34.8	22.4	22.4	93	53	3.6	9.7	5.2	723.44	0	0	18.2
	2020-04-02	34.8	36.4	23	23	96	53	3.7	9.2	5	740.15	0	0	18.2
	2020-04-03	36.4	35.4	22.8	22.8	96	52	2.5	8.3	5.2	734.58	0	0	18.2
	2020-04-04	35.4	35.2	22.4	22.4	96	54	1.5	7.7	5.1	712.3	0	0	18.2
	2020-04-05	35.2	35.4	22.6	22.6	92	53	4.4	8.9	5.4	740.15	0	0	18.2
	2020-04-06	35.4	36.8	25.4	25.4	98	49	2.65	8.5	5	684.45	0	0	18.2
	2020-04-07	36.8	37	25.2	25.2	95	45	3.1	7	4.8	628.75	0	0	18.2
		35.4571	35.8571	23.4	23.4	95.1429	51.2857	3.06429	8.47143	5.1	709.117	0	0	18.2
15	2020-04-08	37	37	25.6	25.6	88	47	1.2	5.5	5.2	656.6	0	0	18.2
	2020-04-09	37.4	36.4	25.8	25.8	86	52	2.6	9.1	5.4	740.15	0	0	18.2
	2020-04-10	36.4	34.4	23.4	23.4	93	55	5	7.7	5.4	692.8	0	0	18.2
	2020-04-11	34.8	34	23.8	23.8	92	59	3.1	3.4	5.4	556.34	0	0	18.2
	2020-04-12	34	35.4	23.2	23.2	96	52	3.9	10.3	5.4	740.15	0	0	18.2
	2020-04-13	35.4	36	23.2	23.2	95	46	2.6	10.3	5.4	639.89	0	0	18.2
	2020-04-14	36	35.2	23.2	23.2	95	51	1.8	9.6	5.2	734.58	0	0	18.2
		35.8571	35.4857	24.0286	24.0286	92.1429	51.7143	2.88571	7.98571	5.34286	680.073	0	0	18.2
16	2020-04-15	35.2	35.8	23.2	23.2	97	58	2.5	10.2	5.2	740.15	0	0	18.2
	2020-04-16	35.8	36.4	24	24	92	54	2.3	10.9	5.4	734.58	0	0	18.2
	2020-04-17	36.4	36.8	25.2	25.2	88	47	2.1	10.2	5.6	740.15	0	0	18.2
	2020-04-18	36.8	37	25.2	25.2	89	51	2.8	9.7	5.4	712.3	0	0	18.2
	2020-04-19	37.2	33.4	25.2	25.2	89	62	2.9	10.2	5	729.01	0	0	18.2
	2020-04-20	33.4	34.8	24.8	24.8	92	58	2.3	8.3	5.4	660.17	0	0	18.2
	2020-04-21	34.8	36.2	24.2	24.2	97	47	3.3	8.8	5.2	706.73	0	0	18.2
		35.6571	35.7714	24.5429	24.5429	92	53.8571	2.6	9.75714	5.31429	717.584	0	0	18.2
17	2020-04-22	36.2	34.8	24.8	24.8	89	60	1.7	9.8	5.4	684.45	0	0	18.2
	2020-04-23	35	36.8	26	26	95	47	1.6	10.7	5.2	695.59	0	0	18.2
	2020-04-24	36.8	36.2	26.2	26.2	85	49	2	10	6.6	740.15	0	0	18.2
	2020-04-25	36.2	36.2	23	23	97	49	1.2	8.7	5.6	684.45	0	0	18.2
	2020-04-26	36.4	35.2	27.2	27.2	88	61	3.7	6	5.8	623.18	0	0	18.2
	2020-04-27	35.2	36.8	25.6	25.6	92	48	0.9	3	4.6	595.33	0	0	18.2
	2020-04-28	36.8	35.4	27.2	27.2	91	65	3	8.9	6.4	740.15	0	0	18.2
		36.0857	35.9143	25.7143	25.7143	91	54.1429	2.01429	8.15714	5.65714	680.471	0	0	18.2
18	2020-04-29	35.4	35.6	26.8	26.8	85	62	2	5.1	5.8	690.02	0	0	18.2
	2020-04-30	35.8	34	25	25	92	72	1.4	4.7	5.8	617.61	0	0	18.2
	2020-05-01	34	36.8	25.2	25.2	85	47	0.6	4.8	4	573.05	3	1	21.2
	2020-05-02	36.8	37	26.8	26.8	85	47	1.1	10.3	6.4	740.15	0	0	21.2
	2020-05-03	34	36.4	26	26	91	58	1.4	9	6.6	734.58	0	0	21.2
	2020-05-04	36.4	36.4	25.4	25.4	92	49	1.65	8.3	5.2	740.15	0	0	21.2
	2020-05-05	36.4	35.4	24.8	24.8	92	53	0.3	5.2	6.4	734.58	0	0	21.2
		35.5429	35.9429	25.7143	25.7143	88.8571	55.4286	1.20714	6.77143	5.74286	690.02	3	1	20.3429
19	2020-05-06	35.4	37.2	25.8	25.8	87	50	0.8	8	6	731.79	0	0	21.2
	2020-05-07	37.2	34.8	26.2	26.2	88	68	0.8	7.7	6	740.15	0	0	21.2
	2020-05-08	35.2	37	26.6	26.6	85	48	0.9	7.8	6.4	678.88	0	0	21.2
	2020-05-09	37	35.4	26.2	26.2	82	60	1.8	11.1	6.8	740.15	0	0	21.2
	2020-05-10	35.6	36.8	26	26	89	53	1.4	9.8	6	717.87	0	0	21.2
	2020-05-11	36.4	36.4	26.4	26.4	85	57	1.2	9.5	6.4	684.45	0	0	21.2
	2020-05-12	36.4	36.4	26.2	26.2	88	73	1.6	5.7	3.8	698.37	0	0	21.2
		36.1714	36.2857	26.2	26.2	86.2857	58.4286	1.21429	8.51429	5.91429	713.094	0	0	21.2
20	2020-05-13	36.4	36.6	24.2	24.2	89	61	2	2.2	2.8	405.95	24	1	45.2
	2020-05-14	36.6	36.8	25.6	25.6	88	63	0.6	7.3	5	734.58	0	0	45.2
	2020-05-15	36.8	36.6	25.6	25.6	88	51	1.8	9.7	6.4	731.79	0	0	45.2
	2020-05-16	36.6	37.2	26.6	26.6	87	47	1.9	8.5	6.2	712.3	0	0	45.2
	2020-05-17	37.2	35	26.6	26.6	91	65	3.1	6	5.8	731.79	0	0	45.2
	2020-05-18	35	36	25	25	81	52	2.9	0.1	4.6	567.48	0	0	45.2
	2020-05-19	36	37	26.8	26.8	75	54	7.5	1.5	5.4	664.95	0	0	45.2
		36.3714	36.4571	25.7714	25.7714	85.5714	56.1429	2.82857	5.04286	5.17143	649.834	24	1	45.2
21	2020-05-20	37.2	36.2	25	25	78	53	9.2	1.3	5	631.53	0	0	45.2
	2020-05-21	36.2	36.4	26.2	26.2	80	57	6.1	6.7	6.6	740.15	0	0	45.2
	2020-05-22	36.4	36.8	26.6	26.6	89	57	4.5	6.8	6.3	723.44	0	0	45.2
	2020-05-23	36.8	37.2	26.4	26.4	91	50	2.8	3.9	6	684.45	0	0	45.2
	2020-05-24	38	37	27.2	27.2	92	54	0.9	7.7	6.3	740.15	0	0	45.2
	2020-05-25	37.8	37.8	27.2	27.2	77	57	1.4	8.1	6.4	723.44	0	0	45.2
	2020-05-26	37.8	37.8	26.8	26.8	78	55	1.8	7.3	6.5	740.15	0	0	45.2
		37.1714	37.0286	26.4857	26.4857	83.5714	54.7143	3.81429	5.97143	6.15714	711.901	0	0	45.2
22	2020-05-27	37.8	36.8	27.8	27.8	94	55	1.5	7	6.4	740.15	0	0	45.2
	2020-05-28	36.8	36.4	27.4	27.4	89	58	3.6	5.2	6.2	684.45	0	0	45.2
	2020-05-29	36.4	35.2	24	24	87	59	4.6	4.2	6	676.09	0	0	45.2
	2020-05-30	35.2	35.4	25.6	25.6	88	61	4.6	6.8	6.2	712.3	0	0	45.2
	2020-05-31	35.4	36	25.4	25.4	85	59	2.9	7.2	6.5	717.87	0	0	45.2
	2020-06-01	36.2	35.2	25.4	25.4	89	57	4	9.8	6.6	740.15	0	0	45.2
	2020-06-02	35.4	35.4	25.2	25.2	86	57	2.8	6	6.2	712.3	0	0	45.2
		36.1714	35.7714	25.8286	25.8286	88.2857	58	3.42857	6.6	6.3	711.901	0	0	45.2
23	2020-06-03	35.4	35.2	24.6	24.6	84	57	4.2	9.6	6.6	734.58	0	0	45.2
	2020-06-04	35.2	35	25.2	25.2	85	58	4.1	7.8	6.3	740.15	0	0	45.2
	2020-06-05	35	35.6	25.4	25.4	86	57	4.8	8.9	6.4	717.87	0	0	45.2
	2020-06-06	35.6	34.6	25	25	91	61	4.1	9	6.4	740.15	0	0	45.2
	2020-06-07	34.6	35.4	24.8	24.8	77	50	3.6	6.3	6.3	723.44	0	0	45.2
	2020-06-08	35.4	35.6	25.2	25.2	76	58	3.8	3.1	5.8	642.67	0	0	45.2
	2020-06-09	38	37.6	25.2	25.2	91	47	1.8	5.6	6.2	740.15	0	0	45.2
		35.6	35.5714	25.0571	25.0571	84.2857	55.4286	3.77143	7.18571	6.28571	719.859	0	0	45.2
24	2020-06-10	37.6	36	24	24	83	61	3	6.3	5.6	701.16	0	0	45.2
	2020-06-11	36	35.6	25.8	25.8	77	60	2.8	0	5.6	567.48	0	0	45.2
	2020-06-12	36	36	24.8	24.8	92	67	2.4	0	4.8	486.71	0	0	45.2
	2020-06-13	36	36	24.2	24.2	86	57	4.5	1.4	5.4	606.47	0	0	45.2
	2020-06-14	36	36	24.2	24.2	87	57	2.8	8.1	6.6	712.3	0	0	45.2
	2020-06-15	36	36	25.2	25.2	79	53	7	8.2	6.4	740.15	0	0	45.2
	2020-06-16	36.2	35.6	25.4	25.4	81	56	6.7	7.4	6.4	734.58	0	0	45.2
		36.2571	35.8857	24.8	24.8	83.5714	58.7143	4.17143	4.48571	5.82857	649.836	0	0	45.2
25	2020-06-17	35.8	35.4	25.4	25.4	89	56	4.9	8.1	6.3	740.15	0	0	45.2
	2020-06-18	35.8	36.2	26.2	26.2	86	55	4.8	6.6	6.2	673.31	0	0	45.2
	2020-06-19	36.2	36	25.8	25.8	89	54	6.2	6	6	712.3	0	0	45.2
	2020-06-20	36.4	36.8	25	25	91	52	3	5.8	6	684.45	0	0	45.2
	2020-06-21	36.8	35.4	25.4	25.4	92	65	1.6	5.4	2.8	734.58	3	1	48.2
	2020-06-22	35.4	35.6	24.6	24.6	87	63	0.9	0	5.6	517.35	0	0	48.2
	2020-06-23	35.6	35.8	25.6	25.6	97	63	3.5	5.4	6	740.15	0	0	48.2
		36	35.8857	25.4286	25.4286	90.1429	58.2857	3.55714	5.32857	5.55714	686.041	3	1	46.4857
26	2020-06-24	35.6	35.6	24.2	24.2	100	65	0	0	2	470	3.9	1	52.1
	2020-06-25	35.6	35.4	23.4	23.4	95	77	0.5	1.8	1.4	547.98	1.8	0	53.9
	2020-06-26	35.4	35.6	23.2	23.2	100	61	0.3	0	4.4	475.57	0	0	53.9
	2020-06-27	35.6	35.4	24.6	24.6	98	58	1.2	8.1	6.2	740.15	0	0	53.9
	2020-06-28	35.4	35	24.6	24.6	94	59	2.1	8.9	6.6	740.15	0	0	53.9
	2020-06-29	35	35.2	24.8	24.8	87	58	0.4	4.8	6.2	634.32	0	0	53.9
	2020-06-30	35.2	34.6	24.2	24.2	87	68	1.9	5.4	3.1	656.6	4.9	1	58.8
		35.4	35.2571	24.1429	24.1429	94.4286	63.7143	0.914286	4.14286	4.27143	609.253	10.6	2	54.3429
27	2020-07-01	34.6	34.6	25	25	89	67	1.2	7.5	6	740.15	0	0	58.8
	2020-07-02	34.6	34.4	24.6	24.6	87	68	2.3	5.1	6	634.1	0	0	58.8
	2020-07-03	34.4	34.4	24.6	24.6	87	64	3.1	0.4	2.6	528.49	2.2	1	61
	2020-07-04	34.4	33.2	23	23	98	72	3.2	1.5	2.4	291.76	14	1	75
	2020-07-05	33.4	33.4	24.2	24.2	95	77	1.9	5.6	4	684.45	0	0	75
	2020-07-06	33.4	34.2	25.2	25.2	79	70	1.6	0.7	4.2	456.08	0	0	75
	2020-07-07	34.2	35.4	24.8	24.8	77	62	3	5.3	5.4	712.3	0	0	75
		34.1429	34.2286	24.4857	24.4857	87.4286	68.5714	2.32857	3.72857	4.37143	578.19	16.2	2	68.3714
28	2020-07-08	35.4	35	24.8	24.8	92	66	3	9	6.4	740.15	0	0	75
	2020-07-09	35	35	24.8	24.8	95	70	0.3	1	5.2	586.97	0	0	75
	2020-07-10	35	35	22.2	22.2	98	79	0.8	5.7	2.8	578.62	25	1	100
	2020-07-11	34.8	35	24.8	24.8	90	69	0.1	2.7	5.8	667.74	0	0	100
	2020-07-12	35.8	34.8	23.2	23.2	90	66	1.5	7.3	6.2	740.15	0	0	100
	2020-07-13	35	35	25.2	25.2	89	81	3.5	9.3	5.4	740.15	0	0	100
	2020-07-14	35	35.6	24.6	24.6	90	66	0.4	2.3	3.4	495.07	0	0	100
		35.1429	35.0571	24.2286	24.2286	92	71	1.37143	5.32857	5.02857	649.836	25	1	92.8571
29	2020-07-15	35.6	35	22.4	22.4	100	74	1.9	6.5	3.1	717.87	16.3	1	116.3
	2020-07-16	35	35	24.6	24.6	87	79	1.3	3	3.6	623.18	0	0	116.3
	2020-07-17	35	31	24.8	24.8	89	72	2.7	0.2	3.8	461.35	0	0	116.3
	2020-07-18	31.2	32.4	23.4	23.4	89	78	4.2	1.4	3.8	545.2	0	0	116.3
	2020-07-19	32.4	32.6	24	24	93	75	0.2	0	3.6	684.45	0	0	116.3
	2020-07-20	33.2	32.2	23.2	23.2	95	91	0.4	1.9	1.2	211	0.9	0	117.2
	2020-07-21	32.6	34	23.2	23.2	92	69	0.9	6.8	5	628.75	0	0	117.2
		33.5714	33.1714	23.6571	23.6571	92.1429	76.8571	1.65714	2.82857	3.44286	553.114	17.2	1	116.557
30	2020-07-22	34	34.2	24.2	24.2	87	72	1.5	8.8	4.6	740.15	0	0	117.2
	2020-07-23	34.2	34.2	24.2	24.2	93	74	1	8.3	3.4	678.88	0	0	117.2
	2020-07-24	34.2	34.2	23.2	23.2	95	70	2.9	3.5	1.9	614.82	2.1	1	119.3
	2020-07-25	34	35.2	24.2	24.2	92	62	1.9	4.6	4.6	698.37	0	0	119.3
	2020-07-26	35	35	21	21	93	66	4.6	9.3	2.2	740.15	22	1	141.3
	2020-07-27	35	35.6	24.6	24.6	86	62	2.3	3.3	4	628.75	0	0	141.3
	2020-07-28	35.6	35.2	22.4	22.4	100	73	2.2	4.8	1.8	684.45	14.4	1	155.7
		34.5714	34.8	23.4	23.4	92.2857	68.4286	2.34286	6.08571	3.21429	683.653	38.5	3	130.186
31	2020-07-29	35.2	35	21.4	21.4	100	86	2.4	0	0.2	528.49	57.4	1	213.1
	2020-07-30	35	35.2	22.8	22.8	85	63	1.6	0	2.2	364.17	0	0	213.1
	2020-07-31	35.2	35.2	22.8	22.8	92	68	3.3	5.9	3.2	740.15	0	0	213.1
	2020-08-01	35.2	35.2	22.4	22.4	98	62	2.8	8.2	1.4	740.15	28.2	1	241.3
	2020-08-02	35.2	35.2	24.2	24.2	80	65	4.2	6.7	1.8	717.87	6.2	1	247.5
	2020-08-03	35.2	35.2	24.8	24.8	86	71	7.4	2.6	3	703.94	0	0	247.5
	2020-08-04	35.2	34	25.2	25.2	79	59	13.6	4.7	3.4	578.62	0	0	247.5
		35.1714	35	23.3714	23.3714	88.5714	67.7143	5.04286	4.01429	2.17143	624.77	91.8	3	231.871
32	2020-08-05	34	34	25.4	25.4	77	69	10.3	3.8	3.8	740.15	0	0	247.5
	2020-08-06	34	34.4	25.2	25.2	92	66	12.6	2.2	4.4	545.2	0	0	247.5
	2020-08-07	34.4	35	24	24	84	62	8.4	5	5.6	678.88	0	0	247.5
	2020-08-08	35	34	26	26	80	63	12.6	8.7	4.4	740.15	0	0	247.5
	2020-08-09	34.6	34.4	22.8	22.8	100	81	9.4	4.7	0.3	670.52	74.1	1	321.6
	2020-08-10	35.6	34.6	23.6	23.6	88	69	7.4	0	0.8	503.42	0	0	321.6
	2020-08-11	34.6	34.6	24.2	24.2	84	69	7.6	6.3	3	684.45	0	0	321.6
		34.6	34.4286	24.4571	24.4571	86.4286	68.4286	9.75714	4.38571	3.18571	651.824	74.1	1	279.257
33	2020-08-12	34.6	33	24.2	24.2	83	68	9.3	8.8	3.6	740.15	0	0	321.6
	2020-08-13	34	34.2	24.2	24.2	83	66	7.6	5.1	3.8	670.52	0	0	321.6
	2020-08-14	34.4	32.8	25.2	25.2	80	68	7.9	5.9	3.4	726.22	0	0	321.6
	2020-08-15	33.4	33.4	23.4	23.4	92	64	5.1	0	4.6	545.2	0	0	321.6
	2020-08-16	33.8	34.8	24.2	24.2	84	53	6	0.2	3	578.62	0	0	321.6
	2020-08-17	34.8	34.4	24.2	24.2	84	63	4.9	5.7	4.8	678.88	0	0	321.6
	2020-08-18	35.4	35.2	25.2	25.2	89	64	3.7	4	3.7	656.6	0	0	321.6
		34.3429	33.9714	24.3714	24.3714	85	63.7143	6.35714	4.24286	3.84286	656.599	0	0	321.6
34	2020-08-19	35.2	34.6	24.4	24.4	84	65	3.6	5.8	0.7	678.88	5.1	1	326.7
	2020-08-20	34.6	34.4	25.2	25.2	87	67	2.1	4.9	2.8	656.6	0	0	326.5
	2020-08-21	34.4	35.4	24.2	24.2	93	66	1.5	0.2	3.6	475.57	0	0	326.5
	2020-08-22	35.4	35	25.2	25.2	92	65	1.9	7.9	5.8	740.15	0	0	326.5
	2020-08-23	35.4	35.4	25.2	25.2	92	61	1.5	7.9	5.2	740.15	0	0	326.5
	2020-08-24	35.4	35.6	23.6	23.6	93	67	2	8.3	3.6	723.44	0	0	326.5
	2020-08-25	35.6	35.6	23.6	23.6	95	65	1.6	9.4	3.8	684.45	1	0	327.7
		35.1429	35.1429	24.4857	24.4857	90.8571	65.1429	2.02857	6.34286	3.64286	671.32	6.1	1	326.7
35	2020-08-26	35.6	35	23.6	23.6	93	65	1.6	8.3	6	692.8	0	0	327.7
	2020-08-27	35.4	35.6	23.6	23.6	93	62	1.9	6.7	6	656.6	0	0	327.7
	2020-08-28	35.6	34.4	24.2	24.2	90	67	2.3	9	2	740.15	4	1	331.7
	2020-08-29	34.4	35.6	24.4	24.4	83	61	0.1	9.2	6.2	740.15	0	0	331.7
	2020-08-30	35.6	36.4	25	25	85	58	2.8	9.7	6.3	712.3	0	0	331.7
	2020-08-31	36.4	36	24.2	24.2	89	58	2.4	9.1	6	723.44	0	0	331.7
	2020-09-01	36	35	23	23	95	65	1.6	7.2	1	667.74	4.2	1	335.9
		35.5714	35.4286	24	24	89.7143	62.2857	1.81429	8.45714	4.78571	704.74	8.2	2	331.157
36	2020-09-02	35	33	23.2	23.2	98	85	2.1	6.9	0.3	698.37	10.3	1	346.2
	2020-09-03	33.2	31.6	23.2	23.2	95	76	2.6	0.2	0.8	419.87	7.2	1	353.4
	2020-09-04	31.6	34.2	23.2	23.2	98	66	2.2	4.1	1	600.9	0	0	353.4
	2020-09-05	34.4	33.2	24.2	24.2	95	73	2.4	6.3	1.4	642.67	0	0	353.4
	2020-09-06	33.4	34.6	24.4	24.4	97	70	1.9	1.5	2.6	559.12	0	0	353.4
	2020-09-07	34.6	34.4	23.2	23.2	92	75	5.4	6.3	6.3	600.9	22.1	1	375.5
	2020-09-08	34.4	34.6	23.2	23.2	86	70	5.3	0.2	0.2	573.05	0	0	375.5
		33.8	33.6571	23.5143	23.5143	94.4286	73.5714	3.12857	3.64286	1.8	584.983	39.6	3	358.686
37	2020-09-09	34.6	34.4	25.2	25.2	93	85	5	9.5	1.6	740.15	0	0	375.5
	2020-09-10	34.4	34.4	22.2	22.2	96	79	4.6	0.9	0.4	495.09	13	1	388.5
	2020-09-11	34.4	34.4	23.4	23.4	93	69	5.8	0	0.8	550.77	0	0	388.5
	2020-09-12	34.4	34.4	24.6	24.6	87	73	7.5	6.1	1.4	656.6	0	0	388.5
	2020-09-13	34.4	34.4	24.4	24.4	84	77	8.1	0	0.4	439.37	0	0	388.5
	2020-09-14	34.4	32.2	24	24	87	73	8.1	0	0.8	350.25	0	0	388.5
	2020-09-15	32.2	32.2	24.2	24.2	86	70	7.6	3	1	531.27	0	0	388.5
		34.1143	33.7714	24	24	89.4286	75.1429	6.67143	2.78571	0.914286	537.643	13	1	386.643
38	2020-09-16	32.4	35	24.2	24.2	84	58	7.3	1	2.2	481.14	0	0	388.5
	2020-09-17	35	35	24.6	24.6	81	62	7.5	5.7	3.2	712.3	0	0	388.5
	2020-09-18	35	34.6	24.2	24.2	84	65	8.6	7.2	1.3	740.15	2.3	1	390.8
	2020-09-19	34.6	34.6	25.4	25.4	78	70	11	3.4	2	656.6	0	0	390.8
	2020-09-20	34.6	34.8	23.8	23.8	85	65	12.3	0	1.6	378.1	0	0	390.8
	2020-09-21	34.6	34.6	24.4	24.4	89	64	12.6	0	1.6	475.57	0	0	390.8
	2020-09-22	34.6	34.6	24.4	24.4	86	66	7.5	3.3	2.8	623.18	0	0	390.8
		34.4	34.7429	24.4286	24.4286	83.8571	64.2857	9.54286	2.94286	2.1	581.006	2.3	1	390.143
39	2020-09-23	34.6	35.6	23.4	23.4	84	59	6.6	6.2	3.4	684.45	0	0	390.8
	2020-09-24	35.6	35	23.4	23.4	86	65	8.1	8.1	2.4	740.15	0	0	390.8
	2020-09-25	35	32	23.4	23.4	91	77	4.8	7.7	2.4	712.3	0	0	390.8
	2020-09-26	32	33.8	24.2	24.2	93	67	5	0.1	2.8	428.23	0	0	390.8
	2020-09-27	32.2	34.8	24.6	24.6	94	67	5.9	4.7	1	600.9	3.8	1	394.6
	2020-09-28	34	34.6	23.6	23.6	95	85	5.4	5.7	2.4	712.3	0	0	394.6
	2020-09-29	34.6	34.6	21.6	21.6	100	75	5.4	3.4	0.7	511.78	16.7	1	411.7
		34	34.3429	23.4571	23.4571	91.8571	70.7143	5.88571	5.12857	2.15714	627.159	20.5	2	394.871
40	2020-09-30	34.6	34.6	21.8	21.8	93	73	5.5	5.4	0.3	678.88	5.1	1	416.4
	2020-10-01	34.6	34.6	23.2	23.2	98	70	6.6	4.9	0.6	717.87	18.2	1	434.6
	2020-10-02	34.6	34.6	24.4	24.4	86	63	6	6.6	1	740.15	0	0	434.6
	2020-10-03	34.6	34.6	25	25	87	56	6.8	7.1	3.2	740.15	0	0	434.6
	2020-10-04	34.6	34.8	24.6	24.6	82	54	8.2	5.8	3.8	628.75	0	0	434.6
	2020-10-05	34.8	35	24	24	80	60	7.6	7.4	4	684.45	0	0	434.6
	2020-10-06	35	36	24.8	24.8	83	60	5	8	4.4	656.6	0	0	434.6
		34.6857	34.8857	23.9714	23.9714	87	62.2857	6.52857	6.45714	2.47143	692.407	23.3	2	432
41	2020-10-07	36	35.2	24.4	24.4	87	64	4.6	8.3	5.2	740.15	0	0	434.6
	2020-10-08	35.2	34.4	21.8	21.8	100	67	2.4	9.1	2.8	734.58	7.8	1	442.4
	2020-10-09	34.4	34	25.4	25.4	92	80	1.1	7.5	5.2	712.3	0	0	442.4
	2020-10-10	34	34	24.2	24.2	93	73	3	5.3	5	656.6	0	0	442.4
	2020-10-11	34	34	24.4	24.4	95	72	1.6	2.4	4.8	600.9	0	0	442.4
	2020-10-12	34	34	24.2	24.2	85	65	3.8	0.5	2.4	489.8	0	0	442.4
	2020-10-13	34	34	25.6	25.6	77	65	6.2	5.1	4.2	673.31	0	0	442.4
		34.5143	34.2286	24.2857	24.2857	89.8571	69.4286	3.24286	5.45714	4.22857	658.234	7.8	1	441.286
42	2020-10-14	34	34	23.4	23.4	87	61	8.2	5.2	4.4	656.6	0	0	442.4
	2020-10-15	34	34	23.2	23.2	80	65	5.8	7	4.6	670.52	0	0	442.4
	2020-10-16	34	35	23.8	23.8	84	78	3.1	9.3	5.8	740.15	0	0	442.4
	2020-10-17	35	34.6	24.4	24.4	89	77	1.4	8.7	4.8	740.15	0	0	442.4
	2020-10-18	34.6	34.6	22.2	22.2	95	81	1.7	4.9	0.4	573.05	30.8	1	473.2
	2020-10-19	34.6	34.4	22.2	22.2	93	74	0	0	1.8	439.37	0	0	473.2
	2020-10-20	34.4	34	24	24	85	79	2	2.9	1.6	575.83	0	0	473.2
		34.3714	34.3714	23.3143	23.3143	87.5714	73.5714	3.17143	5.42857	3.34286	627.953	30.8	1	455.6
43	2020-10-21	34	32.2	24	24	87	73	1.8	2	2.2	559.12	0	0	473.2
	2020-10-22	32.2	32	24.8	24.8	95	73	3.1	3.3	2	545.2	0	0	473.2
	2020-10-23	32	32.2	24	24	93	77	2.1	2.4	2.2	489.5	0	0	473.2
	2020-10-24	32.2	32.6	24.2	24.2	90	65	1.9	3.8	2.2	578.62	0	0	473.2
	2020-10-25	32.8	33	24.2	24.2	97	68	1.8	2.1	2	573.05	0	0	473.2
	2020-10-26	33	32.6	24.2	24.2	93	73	0.3	1.7	2.4	600.9	0	0	473.2
	2020-10-27	33	33	23.8	23.8	98	73	0.1	2.5	1.8	600.9	0	0	473.2
		32.7429	32.5143	24.1714	24.1714	93.2857	71.7143	1.58571	2.54286	2.11429	563.899	0	0	473.2
44	2020-10-28	33	32.8	23.6	23.6	93	71	0.6	7.3	1.8	656.6	0	0	473.2
	2020-10-29	32.8	33	22.6	22.6	87	71	3.2	6.4	2.4	628.75	0	0	473.2
	2020-10-30	33	33	22.2	22.2	79	72	4.7	7.1	3	740.15	0	0	473.2
	2020-10-31	33	33	22.2	22.2	91	68	3.8	5.7	2.8	573.05	0	0	473.2
	2020-11-01	33	33.4	22.2	22.2	95	68	3.1	7.1	2.8	684.45	0	0	473.2
	2020-11-02	33.4	33.4	22.2	22.2	98	75	2.1	6.4	2.8	684.45	0	0	473.2
	2020-11-03	33.4	33.4	22.2	22.2	95	65	2.5	6	2.8	662.17	0	0	473.2
		33.0857	33.1429	22.4571	22.4571	91.1429	70	2.85714	6.57143	2.62857	661.374	0	0	473.2
45	2020-11-04	33.6	33	22.4	22.4	97	69	2	7.9	2.2	623.18	0	0	473.2
	2020-11-05	33	29.8	22.2	22.2	97	81	5.8	4.4	2.6	573.05	0	0	473.2
	2020-11-06	30	28.4	23.6	23.6	100	89	3.8	4.5	0.4	595.33	15.2	1	488.4
	2020-11-07	29	31	23.4	23.4	92	83	0.2	5.3	0.4	600.9	8.2	1	496.6
	2020-11-08	31	31	23.4	23.4	91	79	2.2	3.9	0.3	353.03	6.3	1	502.7
	2020-11-09	31	30.4	23.2	23.2	92	76	3.7	2	1	350.25	0	0	502.9
	2020-11-10	30.8	31	20.8	20.8	91	67	1.9	7.5	1	684.45	0	0	502.9
		31.2	30.6571	22.7143	22.7143	94.2857	77.7143	2.8	5.07143	1.12857	540.027	29.7	3	491.414
46	2020-11-11	31	31	20.6	20.6	85	69	0.7	3.2	1.2	545.2	0	0	502.9
	2020-11-12	31	31	20.8	20.8	98	85	0	3.4	1.6	517.35	0	0	502.9
	2020-11-13	31	31	20.8	20.8	100	93	0	2.8	0.3	405.95	4.9	1	507.8
	2020-11-14	31	31	20.6	20.6	100	86	0.1	0	0.4	294.55	22.4	1	530.2
	2020-11-15	31	31	20.6	20.6	98	71	0.6	0	0.3	350.25	17	1	547.2
	2020-11-16	31	31	20.6	20.6	98	87	0.4	1.1	0.2	294.55	6	1	553.2
	2020-11-17	31	31	20.6	20.6	95	93	0.3	0	0	266.7	3.2	1	556.4
		31	31	20.6571	20.6571	96.2857	83.4286	0.3	1.5	0.571429	382.079	53.5	5	528.657
47	2020-11-18	31	31	20.6	20.6	96	93	0.1	0.6	0.2	322.4	20	1	576.4
	2020-11-19	31	31	20.6	20.6	98	85	0.6	4.3	0.4	740.15	0	0	576.4
	2020-11-20	31	31	20.6	20.6	98	72	0.5	4.8	0.5	628.75	5.5	1	581.9
	2020-11-21	31	31	20.6	20.6	91	74	0.4	7.9	2.6	712.3	0	0	581.9
	2020-11-22	31	31	20.4	20.4	91	75	0.4	8.6	2.2	628.75	0	0	581.9
	2020-11-23	31	31	21.2	21.2	91	75	0.3	4.6	1.4	573.05	0	0	581.9
	2020-11-24	31	31	20.4	20.4	90	84	0.1	0.1	0.8	378.1	0	0	581.9
		31	31	20.6286	20.6286	93.5714	79.7143	0.342857	4.41429	1.15714	569.071	25.5	2	580.329
48	2020-11-25	31	31	22	22	80	86	0.2	0	0	266.7	8	1	589.9
	2020-11-26	31	31	21.6	21.6	100	86	0.3	0	0.2	211	67.5	1	657.4
	2020-11-27	31	31.2	21.4	21.4	100	77	0.2	3.8	1	350.25	0	0	657.4
	2020-11-28	31.2	30	21.4	21.4	100	78	0.4	3.4	1.6	628.75	0	0	657.4
	2020-11-29	30	31.2	21.4	21.4	100	75	0.6	3.6	1.6	350.25	0	0	657.4
	2020-11-30	31.2	29.4	21.4	21.4	100	85	0.5	5.8	0.8	489.75	8.4	1	665.8
	2020-12-01	29.4	29.4	21.2	21.2	96	93	0.4	1.3	0.8	344.68	3	1	668.8
		30.6857	30.4571	21.4857	21.4857	96.5714	82.8571	0.371429	2.55714	0.857143	377.34	86.9	4	650.586
49	2020-12-02	29.4	29.4	21.4	21.4	95	100	0.6	4	0.2	573.05	4.2	1	673
	2020-12-03	29.4	29.4	20.6	20.6	100	95	0.4	0	0	266.7	100.5	1	773.5
	2020-12-04	29.6	29.4	20.4	20.4	100	96	0.2	0	0	183.15	159.1	1	932.6
	2020-12-05	29.4	29.4	20.4	20.4	100	92	0.4	0	0	266.7	59.2	1	991.8
	2020-12-06	29.4	29.4	20.6	20.6	100	90	0.3	0	0	322.4	13.2	1	1005
	2020-12-07	29.4	29.4	20.6	20.6	100	93	0.6	0	0	294.55	41.8	1	1046.8
	2020-12-08	29.4	28	24	24	100	93	0.4	1.1	0.1	405.95	8.1	1	1054.9
		29.4286	29.2	21.1429	21.1429	99.2857	94.1429	0.414286	0.728571	0.0428571	330.357	386.1	7	925.371
50	2020-12-09	28.4	28	21	21	98	86	0.8	4	0.5	419.87	5.1	1	1060
	2020-12-10	28	29.4	20.8	20.8	98	87	4.8	3.8	1.2	573.05	0	0	1060
	2020-12-11	27	28.4	20.4	20.4	96	76	4	7	1.6	628.75	0	0	1060
	2020-12-12	28.4	27	20.2	20.2	98	86	4.4	6.9	1.6	600.9	0	0	1060
	2020-12-13	27	27	20.4	20.4	96	84	3.3	4.3	2.2	545.2	0	0	1060
	2020-12-14	27.8	29	20.2	20.2	98	67	3.9	4.9	1.6	573.05	0	0	1060
	2020-12-15	29	28	20.2	20.2	94	80	4	7.6	1	628.75	0	0	1060
		27.9429	28.1143	20.4571	20.4571	96.8571	80.8571	3.6	5.5	1.38571	567.081	5.1	1	1060
51	2020-12-16	28	26.2	20.2	20.2	100	92	4.6	0.3	0.3	294.55	21.3	1	1081.3
	2020-12-17	26.2	26.2	20.2	20.2	100	92	4.5	0.8	0.3	266.7	13.3	1	1094.6
	2020-12-18	26.2	26.4	20.2	20.2	100	90	4	0	0.2	238.85	24.6	1	1119.2
	2020-12-19	28.8	30	20.2	20.2	96	65	4.2	0.3	0	294.55	19.2	1	1138.4
	2020-12-20	30	29.4	20.2	20.2	100	66	9.9	2.5	0.4	350.25	0	0	1138.4
	2020-12-21	29.4	28.8	19.2	19.2	91	84	2.1	4.5	0.6	355.82	0	0	1138.4
	2020-12-22	29	27.8	19.2	19.2	89	74	5.9	1.9	0.4	405.95	0	0	1138.4
		28.2286	27.8286	19.9143	19.9143	96.5714	80.4286	5.02857	1.47143	0.314286	315.239	78.4	4	1121.24
52	2020-12-23	27.8	27.8	19.2	19.2	91	98	4.9	2.3	0.4	517.35	0	0	1138.4
	2020-12-24	27.8	27	19.8	19.8	94	92	4.9	5.5	1.2	517.35	0	0	1138.4
	2020-12-25	27	27.4	19.2	19.2	91	78	4.6	5.8	1.4	489.5	0	0	1138.4
	2020-12-26	27.4	27	18.2	18.2	98	78	4.1	6.5	1.4	550.77	0	0	1138.4
	2020-12-27	27.4	27.2	20.2	20.2	91	80	2.6	7.2	2.2	405.95	0	0	1138.4
	2020-12-28	27.2	28	20.2	20.2	93	79	9.9	4.7	1.6	461.55	0	0	1138.4
	2020-12-29	28	26.2	22.6	22.6	90	92	6	2.4	0.8	433.8	0	0	1138.4
		27.5143	27.2286	19.9143	19.9143	92.5714	85.2857	5.28571	4.91429	1.28571	482.324	0	0	1138.4
53	2020-12-30	26.2	27	21.4	21.4	93	90	5.4	0	0.2	183.15	4.2	1	1142.6
	2020-12-31	27	28.4	21.4	21.4	100	82	6.3	1.6	0.2	266.7	60.2	1	1202.8
		27.2449	27.2898	20.5592	20.5592	93.9388	83.7551	5.6551	3.90204	1.09796	397.749	64.4	2	1148.2

## Sheet: Std wk 20
	Week	Temp 0C				RH (%)		W.V	SS	Eva	Radiation	Rainfall	RD	Since
		Max 0C		Min 0C
		I	II	I	II	I	II	(km/h)	Hours	mm	cal/ cm2	(mm)
	1	29.5429	29.5143	21.3714	21.3714	97.4286	86.2857	0.642857	5.42857	1.04286	374.117	5.8	1	0.828571
	2	29.9714	29.4857	19.6286	19.6286	97.7143	90.4286	0	6.32857	1.68571	521.324	2.2	1	8
	3	30.0571	29.3714	18.2	18.2	94.1429	87.7143	0	6.95714	1.48571	547.947	10.2	1	13.8286
	4	30.4857	30.6	17.5429	17.5429	95.2857	89.4286	0	7.32857	2.14286	605.674	0	0	18.2
	5	32.6	32.1714	18.9429	18.9429	95.7143	85	0.0428571	8.01429	3.52857	668.536	0	0	18.3143
	6	32.0857	31.9714	18.8	18.8	96.5714	87.2857	0.271429	7.87143	4.48571	692.407	0	0	18.4
	7	32.4571	32.1667	19.3714	19.3714	96.2857	91.2857	0.142857	7.98571	5.04286	722.246	0	0	18.4
	8	31.8857	32.0286	19.2571	19.2571	95.4286	88.7143	0.0857143	7.54286	5.07143	722.644	0	0	18.3714
	9	32.8286	32.8286	20.2857	20.2857	95.2857	87.2857	0.0142857	8.32857	5.18571	733.783	0	0	18.2
	10	34.4429	34.3143	21.4571	21.4571	94.8571	60.4286	0.128571	7.12857	4.94286	729.804	0	0	18.2
	11	34.2857	34.1143	21.1429	21.1429	95	53.2857	0	8.17143	4.94286	711.503	0	0	18.2
	12	34.8857	34.8571	22.1429	22.1429	95	50.2857	1.17143	7.51429	5.37143	701.16	0	0	18.2
	13	34.2571	34.2571	21.4286	21.4286	94.5714	52	3.08571	8.88571	5.27143	718.666	0	0	18.2
	14	35.4571	35.8571	23.4	23.4	95.1429	51.2857	3.06429	8.47143	5.1	709.117	0	0	18.2
	15	35.8571	35.4857	24.0286	24.0286	92.1429	51.7143	2.88571	7.98571	5.34286	680.073	0	0	18.2
	16	35.6571	35.7714	24.5429	24.5429	92	53.8571	2.6	9.75714	5.31429	717.584	0	0	18.2
	17	36.0857	35.9143	25.7143	25.7143	91	54.1429	2.01429	8.15714	5.65714	680.471	0	0	18.2
	18	35.5429	35.9429	25.7143	25.7143	88.8571	55.4286	1.20714	6.77143	5.74286	690.02	3	1	20.3429
	19	36.1714	36.2857	26.2	26.2	86.2857	58.4286	1.21429	8.51429	5.91429	713.094	0	0	21.2
	20	36.3714	36.4571	25.7714	25.7714	85.5714	56.1429	2.82857	5.04286	5.17143	649.834	24	1	45.2
	21	37.1714	37.0286	26.4857	26.4857	83.5714	54.7143	3.81429	5.97143	6.15714	711.901	0	0	45.2
	22	36.1714	35.7714	25.8286	25.8286	88.2857	58	3.42857	6.6	6.3	711.901	0	0	45.2
	23	35.6	35.5714	25.0571	25.0571	84.2857	55.4286	3.77143	7.18571	6.28571	719.859	0	0	45.2
	24	36.2571	35.8857	24.8	24.8	83.5714	58.7143	4.17143	4.48571	5.82857	649.836	0	0	45.2
	25	36	35.8857	25.4286	25.4286	90.1429	58.2857	3.55714	5.32857	5.55714	686.041	3	1	46.4857
	26	35.4	35.2571	24.1429	24.1429	94.4286	63.7143	0.914286	4.14286	4.27143	609.253	10.6	2	54.3429
	27	34.1429	34.2286	24.4857	24.4857	87.4286	68.5714	2.32857	3.72857	4.37143	578.19	16.2	2	68.3714
	28	35.1429	35.0571	24.2286	24.2286	92	71	1.37143	5.32857	5.02857	649.836	25	1	92.8571
	29	33.5714	33.1714	23.6571	23.6571	92.1429	76.8571	1.65714	2.82857	3.44286	553.114	17.2	1	116.557
	30	34.5714	34.8	23.4	23.4	92.2857	68.4286	2.34286	6.08571	3.21429	683.653	38.5	3	130.186
	31	35.1714	35	23.3714	23.3714	88.5714	67.7143	5.04286	4.01429	2.17143	624.77	91.8	3	231.871
	32	34.6	34.4286	24.4571	24.4571	86.4286	68.4286	9.75714	4.38571	3.18571	651.824	74.1	1	279.257
	33	34.3429	33.9714	24.3714	24.3714	85	63.7143	6.35714	4.24286	3.84286	656.599	0	0	321.6
	34	35.1429	35.1429	24.4857	24.4857	90.8571	65.1429	2.02857	6.34286	3.64286	671.32	6.1	1	326.7
	35	35.5714	35.4286	24	24	89.7143	62.2857	1.81429	8.45714	4.78571	704.74	8.2	2	331.157
	36	33.8	33.6571	23.5143	23.5143	94.4286	73.5714	3.12857	3.64286	1.8	584.983	39.6	3	358.686
	37	34.1143	33.7714	24	24	89.4286	75.1429	6.67143	2.78571	0.914286	537.643	13	1	386.643
	38	34.4	34.7429	24.4286	24.4286	83.8571	64.2857	9.54286	2.94286	2.1	581.006	2.3	1	390.143
	39	34	34.3429	23.4571	23.4571	91.8571	70.7143	5.88571	5.12857	2.15714	627.159	20.5	2	394.871
	40	34.6857	34.8857	23.9714	23.9714	87	62.2857	6.52857	6.45714	2.47143	692.407	23.3	2	432
	41	34.5143	34.2286	24.2857	24.2857	89.8571	69.4286	3.24286	5.45714	4.22857	658.234	7.8	1	441.286
	42	34.3714	34.3714	23.3143	23.3143	87.5714	73.5714	3.17143	5.42857	3.34286	627.953	30.8	1	455.6
	43	32.7429	32.5143	24.1714	24.1714	93.2857	71.7143	1.58571	2.54286	2.11429	563.899	0	0	473.2
	44	33.0857	33.1429	22.4571	22.4571	91.1429	70	2.85714	6.57143	2.62857	661.374	0	0	473.2
	45	31.2	30.6571	22.7143	22.7143	94.2857	77.7143	2.8	5.07143	1.12857	540.027	29.7	3	491.414
	46	31	31	20.6571	20.6571	96.2857	83.4286	0.3	1.5	0.571429	382.079	53.5	5	528.657
	47	31	31	20.6286	20.6286	93.5714	79.7143	0.342857	4.41429	1.15714	569.071	25.5	2	580.329
	48	30.6857	30.4571	21.4857	21.4857	96.5714	82.8571	0.371429	2.55714	0.857143	377.34	86.9	4	650.586
	49	29.4286	29.2	21.1429	21.1429	99.2857	94.1429	0.414286	0.728571	0.0428571	330.357	386.1	7	925.371
	50	27.9429	28.1143	20.4571	20.4571	96.8571	80.8571	3.6	5.5	1.38571	567.081	5.1	1	1060
	51	28.2286	27.8286	19.9143	19.9143	96.5714	80.4286	5.02857	1.47143	0.314286	315.239	78.4	4	1121.24
	52	27.5143	27.2286	19.9143	19.9143	92.5714	85.2857	5.28571	4.91429	1.28571	482.324	0	0	1138.4
	53	27.2449	27.2898	20.5592	20.5592	93.9388	83.7551	5.6551	3.90204	1.09796	397.749	64.4	2	1148.2
												1202.8	61

## Sheet: 2021
	Real Time Daily Weather Data 2021
	Date	Temp 0C				RH (%)		W.V	SS	Eva	Radiation	Rainfall	RD	Since
		Max 0C		Min 0C
		I	II	I	II	I	II	(km/h)	Hours	mm	cal/ cm2	(mm)
1	2021-01-01	28.4	26.8	20.8	20.8	96	84	6.7	5	0.2	350.25	5.2	1	5.2
	2021-01-02	27.2	25.2	20.6	20.6	83	90	5.3	0.9	0.4	266.7	0	0	5.2
	2021-01-03	26	27	20.4	20.4	90	95	6.5	2.2	0.4	252.77	7.2	1	12.4
	2021-01-04	27	26.2	20.6	20.6	96	92	4.1	0	0.6	294.55	3	1	15.4
	2021-01-05	25.4	27	20.4	20.4	98	87	4.8	5.3	0.2	461.65	1.2	0	16.6
	2021-01-06	27.4	28	20.4	20.4	98	100	4.3	0.2	1	350.25	4	1	20.6
	2021-01-07	28	29.4	20.4	20.4	98	74	2.4	1	1.3	266.7	95.1	1	115.7
		27.0571	27.0857	20.5143	20.5143	94.1429	88.8571	4.87143	2.08571	0.585714	320.41	115.7	5	27.3
2	2021-01-08	29.4	28	20.2	20.2	96	90	4.7	6.7	1.4	573.05	0	0	115.7
	2021-01-09	29	28	20.2	20.2	96	86	3.6	1	0.1	405.95	14.1	1	123.8
	2021-01-10	28	27.2	20.2	20.2	96	92	6	0.9	0.2	350.25	1.2	0	131
	2021-01-11	27.8	27	20.2	20.2	96	95	3.4	0	0.1	183.15	32.1	1	163.1
	2021-01-12	27	26.8	20	20	100	87	1.9	0	1	266.7	85	1	248.1
	2021-01-13	26.8	26.4	20.6	20.6	100	95	9.7	0.9	0.2	294.55	93.2	1	341.3
	2021-01-14	26.8	27	20.6	20.6	100	82	5.6	0.2	0.1	266.7	12.1	1	353.4
		27.8286	27.2	20.2857	20.2857	97.7143	89.5714	4.98571	1.38571	0.442857	334.336	237.7	5	210.914
3	2021-01-15	27	27	20.8	20.8	100	85	4.3	3.4	0.2	238.85	18.2	1	371.6
	2021-01-16	27	27.8	20.6	20.6	90	80	2.9	0	0.4	294.55	13	1	384.6
	2021-01-17	27.8	27.2	20.6	20.6	100	83	3.9	2	0.6	405.95	0	0	384.6
	2021-01-18	27.2	29	19	19	96	73	5	7.5	0.2	573.05	0	0	384.6
	2021-01-19	28	29.4	19.8	19.8	98	65	4.9	7.9	0.8	600.9	0	0	384.6
	2021-01-20	29.4	28.4	19.8	19.8	93	79	4.8	7	1.8	628.75	0	0	384.6
	2021-01-21	28.8	30	22.2	22.2	96	81	3.5	0	1.2	405.95	0	0	384.6
		27.8857	28.4	20.4	20.4	96.1429	78	4.18571	3.97143	0.742857	449.714	31.2	2	382.743
4	2021-01-22	30	31	22.2	22.2	100	79	2.4	4.6	1.2	545.2	0	0	384.6
	2021-01-23	31	30	22	22	95	79	2.5	6.3	1.6	517.35	0	0	384.6
	2021-01-24	30.2	30.2	20.4	20.4	98	70	3.8	6.1	1.8	628.75	0	0	384.6
	2021-01-25	30.2	30.8	19.2	19.2	98	68	3.1	6	1.6	573.05	0	0	384.6
	2021-01-26	30.8	30	19.4	19.4	98	62	3.7	8.2	2	517.35	0	0	384.6
	2021-01-27	30	29.4	18.8	18.8	87	65	5	8.9	2	628.75	0	0	384.6
	2021-01-28	30.4	29	18.2	18.2	89	66	4	6.5	1.4	656.6	0	0	384.6
		30.3714	30.0571	20.0286	20.0286	95	69.8571	3.5	6.65714	1.65714	581.007	0	0	384.6
5	2021-01-29	29.2	29.4	18.2	18.2	96	66	5.3	4	1.8	517.35	0	0	384.6
	2021-01-30	29.8	29.2	18.2	18.2	64	96	4.8	5.1	1.4	573.05	0	0	384.6
	2021-01-31	29.4	18	18	18	93	63	2.3	6.8	1.8	600.9	0	0	384.6
	2021-02-01	30.4	31.8	18.2	18.2	63	69	7.8	8.1	2.2	600.9	0	0	384.6
	2021-02-02	31.8	30.4	18.2	18.2	93	64	6.8	8.7	2	684.45	0	0	384.6
	2021-02-03	30.4	30.4	21.2	21.2	88	67	5.7	7.3	1.8	634.32	0	0	384.6
	2021-02-04	30.4	30.4	19.2	19.2	94	62	6.6	7.7	1.8	573.05	0	0	384.6
		30.2	28.5143	18.7429	18.7429	84.4286	69.5714	5.61429	6.81429	1.82857	597.717	0	0	384.6
6	2021-02-05	30.4	30.4	18.8	18.8	96	66	6.8	7.4	2.2	656.6	0	0	384.6
	2021-02-06	30.4	30.4	18.6	18.6	96	61	5.7	8.1	1.6	656.6	0	0	384.6
	2021-02-07	30.4	30.2	18.2	18.2	98	65	5.7	7.7	2.2	628.75	0	0	384.6
	2021-02-08	30.4	30.6	18.2	18.2	98	58	6.5	8.8	1.4	656.6	0	0	384.6
	2021-02-09	30.8	30.2	19.2	19.2	94	58	6.6	8.7	1.8	684.45	0	0	384.6
	2021-02-10	30.2	30.2	18.2	18.2	92	61	6.2	7.5	2.6	656.6	0	0	384.6
	2021-02-11	30.2	30.4	17.2	17.2	92	62	5.3	8.9	3	634.32	0	0	384.6
		30.4	30.3429	18.3429	18.3429	95.1429	61.5714	6.11429	8.15714	2.11429	653.417	0	0	384.6
7	2021-02-12	30.4	31.4	17.2	17.2	90	60	5.4	9.3	2.6	642.67	0	0	384.6
	2021-02-13	31.4	31	17	17	92	61	5.1	7.6	3	712.3	0	0	384.6
	2021-02-14	31.4	30	17	17	93	60	4.8	8	3	573.05	0	0	384.6
	2021-02-15	31.4	32.4	17	17	87	60	5.4	9.3	2.2	684.45	0	0	384.6
	2021-02-16	32.4	32.6	17.2	17.2	93	63	5.3	8.4	2.6	684.45	0	0	384.6
	2021-02-17	32.6	32.8	17	17	96	68	3.6	9.6	2.6	573.05	0	0	384.6
	2021-02-18	32.8	32.6	17	17	98	65	5.3	8.1	3.2	628.75	0	0	384.6
		31.7714	31.8286	17.0571	17.0571	92.7143	62.4286	4.98571	8.61429	2.74286	642.674	0	0	384.6
8	2021-02-19	32.6	32.6	19.8	19.8	91	69	6.8	7	2.6	606.47	0	0	384.6
	2021-02-20	32.6	32.8	20	20	96	76	5.6	1.4	0.5	517.35	2.3	0	386.9
	2021-02-21	32.8	27.8	19.8	19.8	90	76	7.7	0	0.2	503.42	6.2	1	393.1
	2021-02-22	32.4	29.2	19.8	19.8	90	79	3.9	0	0.4	483.93	6.2	1	399.3
	2021-02-23	30	27.8	21.2	21.2	98	76	7.9	4.8	2.8	517.35	2.8	1	402.1
	2021-02-24	31.5	29.4	21	21	98	76	5.4	7.5	2.4	656.6	0	0	402.1
	2021-02-25	32.4	30	19.2	19.2	100	78	4.2	7	2.2	684.45	0	0	402.1
		32.0429	29.9429	20.1143	20.1143	94.7143	75.7143	5.92857	3.95714	1.58571	567.081	17.5	3	395.743
9	2021-02-26	30	30	19.2	19.2	93	72	3.7	7.7	2	684.45	0	0	402.1
	2021-02-27	30	30.2	19.4	19.4	94	70	2.6	6.5	1.6	628.75	0	0	402.1
	2021-02-28	34	34	18	18	100	76	3.5	8.2	1.6	614.45	0	0	402.1
	2021-03-01	34	33.6	18	18	96	59	3.3	7.5	1.8	712.3	0	0	402.1
	2021-03-02	33.8	34.4	19.8	19.8	93	35	3.8	8.3	1..4	740.15	0	0	402.1
	2021-03-03	34.4	32.8	19	19	94	51	4.4	7	2.6	667.74	0	0	402.1
	2021-03-04	32.8	32.8	19.2	19.2	94	54	5	7.6	3.8	684.45	0	0	402.1
		32.7143	32.5429	18.9429	18.9429	94.8571	59.5714	3.75714	7.54286	2.23333	676.041	0	0	402.1
10	2021-03-05	32.4	33	19.6	19.6	91	51	5.7	8	2.4	684.45	0	0	402.1
	2021-03-06	33	34.4	19.4	19.4	95	45	5	9.1	2.6	712.3	0	0	402.1
	2021-03-07	34.4	34	19.6	19.6	96	46	4.8	9.4	2.6	740.15	0	0	402.1
	2021-03-08	34	34.6	19.2	19.2	96	53	4.8	9.1	3.2	723.14	0	0	402.1
	2021-03-09	34.6	34.8	19.6	19.6	95	51	6.2	8.5	2.4	656.6	0	0	402.1
	2021-03-10	34.4	34.2	23.2	23.2	98	52	6.5	7.9	2.4	628.75	0	0	402.1
	2021-03-11	34.4	34	22	22	95	47	6.8	7.7	3.2	656.6	0	0	402.1
		33.8857	34.1429	20.3714	20.3714	95.1429	49.2857	5.68571	8.52857	2.68571	685.999	0	0	402.1
11	2021-03-12	34	34.4	20	20	87	48	4.5	9	3	-	0	0	402.1
	2021-03-13	34	34	20	20	91	57	5.3	9.3	3.2	-	0	0	402.1
	2021-03-14	34	34	19.8	19.8	69	55	6.1	8	3.2	-	0	0	402.1
	2021-03-15	34	34.8	19	19	100	39	5.3	7.8	3.2	-	0	0	402.1
	2021-03-16	34.8	34.2	20.2	20.2	93	54	5.2	8.3	3	-	0	0	402.1
	2021-03-17	34.2	34	20.2	20.2	98	57	5	8.3	3.4	-	0	0	402.1
	2021-03-18	34	32.8	20.2	20.2	93	61	4.5	6.6	3.6	-	0	0	402.1
		34.1429	34.0286	19.9143	19.9143	90.1429	53	5.12857	8.18571	3.22857	-	0	0	402.1
12	2021-03-19	34	34	19.2	19.2	93	52	5.5	7	4	-	0	0	402.1
	2021-03-20	34	34.4	19.2	19.2	95	57	4.8	7.5	4	-	0	0	402.1
	2021-03-21	34.4	33.8	19.2	19.2	95	55	3.5	7.4	4.4	-	0	0	402.1
	2021-03-22	34.2	34.8	19.2	19.2	93	50	4.3	6.9	4.2	-	0	0	402.1
	2021-03-23	34.8	34.6	21.6	21.6	92	53	5.1	6.8	4	-	0	0	402.1
	2021-03-24	34.4	35	20.6	20.6	95	49	5.6	7.6	4	-	0	0	402.1
	2021-03-25	35	34.6	22.2	22.2	96	53	5	5.1	4.6	-	0	0	402.1
		34.4	34.4571	20.1714	20.1714	94.1429	52.7143	4.82857	6.9	4.17143	-	0	0	402.1
13	2021-03-26	34.2	35.4	22.6	22.6	97	51	4.5	4.9	4	-	0	0	402.1
	2021-03-27	35.4	35.2	22.2	22.2	96	57	5.5	6.6	4.2	-	0	0	402.1
	2021-03-28	35.2	35.2	22.2	22.2	93	56	4.7	7.3	3.8	-	0	0	402.1
	2021-03-29	35.2	36	22.4	22.4	93	54	3.3	6.8	4.2	-	0	0	402.1
	2021-03-30	36	36	22.2	22.2	95	54	5.5	6.5	3.6	-	0	0	402.1
	2021-03-31	36	37.6	24.2	24.2	92	41	5.8	7.2	4	-	0	0	402.1
	2021-04-01	37.6	39.4	24.2	24.2	89	48	8.8	7.8	4.6	-	0	0	402.1
		35.6571	36.4	22.8571	22.8571	93.5714	51.5714	5.44286	6.72857	4.05714	-	0	0	402.1
14	2021-04-02	38.4	37.2	22.4	22.4	94	53	9.5	7.1	4.2	-	0	0	402.1
	2021-04-03	37.2	38	24.4	24.4	94	49	4.9	7.1	4.6	-	0	0	402.1
	2021-04-04	38	37.4	24.2	24.2	85	50	7.3	7.8	1.4	-	0	0	402.1
	2021-04-05	36.4	36.8	25	25	92	52	4.4	7.7	3.8	-	0	0	402.1
	2021-04-06	36.8	36	24.2	24.2	92	53	4.9	6.1	3.6	-	0	0	402.1
	2021-04-07	36	36.2	21.4	21.4	96	42	3.95	6.8	3.8	-	0	0	402.1
	2021-04-08	35.2	35.8	21.4	21.4	94	48	4.9	8.2	3.4	-	0	0	402.1
		36.8571	36.7714	23.2857	23.2857	92.4286	49.5714	5.69286	7.25714	3.54286	-	0	0	402.1
15	2021-04-09	35.8	36	22.2	22.2	98	48	4.1	7.8	4.2	-	0	0	402.1
	2021-04-10	36.4	35	22.6	22.6	89	42	3.9	6.7	4.8	-	0	0	402.1
	2021-04-11	35	35	22.2	22.2	82	43	4.9	6.8	4.2	-	0	0	402.1
	2021-04-12	35	34.8	22.4	22.4	90	73	3.2	4.3	2	-	2	0	404.1
	2021-04-13	34.8	34.8	22.2	22.2	98	74	3.1	0.8	2	-	0.6	0	404.7
	2021-04-14	34.8	31.8	23.2	23.2	93	79	3.4	7.2	3.2	-	0	0	404.7
	2021-04-15	34	31.8	24.4	24.4	95	72	3.7	4.6	2.2	-	15	1	419.7
		35.1143	34.1714	22.7429	22.7429	92.1429	61.5714	3.75714	5.45714	3.22857	-	17.6	1	405.643
16	2021-04-16	31.8	35.2	22.6	22.6	93	52	3.85	2.1	3.2	-	0	0	419.7
	2021-04-17	35.2	35.4	24.4	24.4	92	56	2.8	6.9	4.2	-	0	0	419.7
	2021-04-18	35.4	35.2	24.6	24.6	94	48	4	7.5	4	-	0	0	419.7
	2021-04-19	35.4	36.2	24.2	24.2	92	57	6.6	8.4	4.2	-	0	0	419.7
	2021-04-20	36.2	36	24.6	24.6	91	58	6	8.3	4	-	0	0	419.7
	2021-04-21	36	37	24.6	24.6	98	39	3.1	4	4.4	-	0	0	419.7
	2021-04-22	37.4	37	24.6	24.6	85	45	3.8	7.8	4.6	-	0	0	419.7
		35.3429	36	24.2286	24.2286	92.1429	50.7143	4.30714	6.42857	4.08571	-	0	0	419.7
17	2021-04-23	37	37	24.8	24.8	92	44	3.6	7.9	4.6	-	0	0	419.7
	2021-04-24	37	36.4	24.6	24.6	97	51	3.4	8	4.4	-	0	0	419.7
	2021-04-25	36.4	36	24.6	24.6	83	53	4	7.5	4	-	0	0	419.7
	2021-04-26	36	36.2	24.8	24.8	92	53	3.6	7.4	3.8	-	0	0	419.7
	2021-04-27	36.2	36	24.8	24.8	94	54	3.1	6.9	4.4	-	0	0	419.7
	2021-04-28	36	37	24.6	24.6	97	46	3.2	8.3	4.2	-	0	0	419.7
	2021-04-29	37	37	25	25	91	53	3.8	9.4	4.3	-	0	0	419.7
		36.5143	36.5143	24.7429	24.7429	92.2857	50.5714	3.52857	7.91429	4.24286	-	0	0	419.7
18	2021-04-30	36.8	36.8	25	25	92	47	3.1	8.7	4.6	-	0	0	419.7
	2021-05-01	36.8	36.4	24.4	24.4	88	47	4.1	7.4	4.6	-	0	0	402.1
	2021-05-02	36.8	36.8	24.2	24.2	88	74	3.9	6.9	4.2	-	0	0	402.1
	2021-05-03	36.8	37	24.4	24.4	94	68	4.4	7.5	4.8	-	0	0	402.1
	2021-05-04	36.8	37	24	24	91	86	4	6.8	4.2	-	0	0	402.1
	2021-05-05	37	37	23	23	88	59	3.9	6.7	4.2	-	0	0	402.1
	2021-05-06	37	35.8	24	24	86	64	4.4	9.3	4.6	-	0	0	402.1
		36.8571	36.6857	24.1429	24.1429	89.5714	63.5714	3.97143	7.61429	4.45714	-	0	0	404.614
19	2021-05-07	36	35.4	24	24	88	58	7.7	10.2	5	-	0	0	402.1
	2021-05-08	25.6	36	24	24	91	59	2.7	8.7	4.8	-	0	0	402.1
	2021-05-09	36	35	24	24	85	70	5.7	9.3	4.6	-	0	0	402.1
	2021-05-10	35	34	24	24	92	67	2.7	6.7	4.2	-	0	0	402.1
	2021-05-11	34	36	24	24	91	62	3.3	8.4	4.4	-	0	0	402.1
	2021-05-12	36	37	24	24	59	55	5.4	6.2	4.2	-	0	0	404.1
	2021-05-13	37	36.8	24	24	83	71	5.1	6.9	3.8	-	0	0	404.7
		34.2286	35.7429	24	24	84.1429	63.1429	4.65714	8.05714	4.42857	-	0	0	402.757
20	2021-05-14	36.8	35.2	24	24	91	62	3.5	3.1	4.2	-	0	0	404.7
	2021-05-15	35.4	37.8	24	24	86	69	7.9	7.9	4.4	-	0	0	419.7
	2021-05-16	35	35.2	24	24	92	75	7	8.1	4.4	-	0	0	419.7
	2021-05-17	35.2	36	22.2	22.2	82	60	4.9	6.6	1.7	-	10.1	1	429.8
	2021-05-18	36	36.2	22.2	22.2	81	54	3.9	9.5	4.4	-	0	0	429.8
	2021-05-19	37	37	22.2	22.2	89	54	4.1	8.5	4.4	-	0	0	429.8
	2021-05-20	37	37	23	23	87	62	6	9.1	4.4	-	0	0	429.8
		36.0571	36.3429	23.0857	23.0857	86.8571	62.2857	5.32857	7.54286	3.98571	-	10.1	1	423.329
21	2021-05-21	37	37	22.2	22.2	89	70	5.3	3.4	3.6	-	0	0	429.8
	2021-05-22	37	35.2	22.2	22.2	84	48	5	0.9	3.8	-	0	0	429.8
	2021-05-23	35.2	35.4	22.4	22.4	84	51	5.3	0	3.4	-	0	0	429.8
	2021-05-24	35.4	35.2	22	22	74	59	7.6	4.2	3.2	-	0	0	429.8
	2021-05-25	35.4	35.8	23.8	23.8	76	61	8	3.2	3.8	-	0	0	429.8
	2021-05-26	35.8	35	24.4	24.4	87	47	9.9	8.4	4	-	0	0	429.8
	2021-05-27	35.2	36.2	22	22	92	47	10.2	3.7	4	-	0	0	429.8
		35.8571	35.6857	22.7143	22.7143	83.7143	54.7143	7.32857	3.4	3.68571	-	0	0	429.8
22	2021-05-28	36.2	36	22.4	22.4	77	43	9.3	7	4.2	-	0	0	429.8
	2021-05-29	36	36.4	23	23	77	45	6.1	7.7	4.2	-	0	0	429.8
	2021-05-30	36.4	35.8	22.8	22.8	75	52	7.5	6.4	4.6	-	0	0	429.8
	2021-05-31	36	36.2	20.8	20.8	85	63	6.15	7.2	2.4	-	21.2	1	451
	2021-06-01	36.2	36.4	21.8	21.8	72	60	7.6	9	4.8	-	0	0	451
	2021-06-02	35	36.4	21.8	21.8	87	62	4.4	8.5	4.4	-	0	0	451
	2021-06-03	36.4	36.6	21.8	21.8	84	61	4.4	9.3	4.8	-	0	0	451
		36.0286	36.2571	22.0571	22.0571	79.5714	55.1429	6.49286	7.87143	4.2	-	21.2	1	441.914
23	2021-06-04	36.6	35	25.2	25.2	94	62	3.3	8.3	4.4	-	0	0	451
	2021-06-05	35	34	24	24	93	67	4.5	5.7	4	-	0	0	451
	2021-06-06	34	34	22	22	77	57	3.6	0.5	2	-	13	1	464
	2021-06-07	34	34.8	21.4	21.4	95	56	6.9	7.1	3	-	0	0	464
	2021-06-08	34.8	35	21.2	21.2	91	65	6.5	8.5		-	0	0	464
	2021-06-09	35	35.4	23.6	23.6	86	52	3	6.5	1.8	-	2.4	1	466.4
	2021-06-10	35.4	35.2	23.6	23.6	92	61	12.1	6.7	3.8	-	0	0	466.4
		34.9714	34.7714	23	23	89.7143	60	5.7	6.18571	3.16667	-	15.4	2	460.971
24	2021-06-11	35.4	35.2	24.8	24.8	94	47	9.7	7.2	4.4	-	0	0	466.4
	2021-06-12	35.2	35.2	24.8	24.8	91	57	6.5	7.1	4.2	-	0	0	466.4
	2021-06-13	35.2	35	24.2	24.2	85	57	13.4	7.6	1.1	-	9.3	1	475.7
	2021-06-14	35.4	35.2	23.2	23.2	94	48	13.7	3.6	3.8	-	0	0	475.7
	2021-06-15	35.2	35.2	23.4	23.4	90	55	13.3	0.8	4.4	-	0	0	475.7
	2021-06-16	35.4	35.2	23.2	23.2	90	52	8.2	4.3	4.6	-	0	0	475.7
	2021-06-17	35.6	35.8	23.2	23.2	93	50	11.6	8.4	4.2	-	0	0	475.7
		35.3429	35.2571	23.8286	23.8286	91	52.2857	10.9143	5.57143	3.81429	-	9.3	1	473.043
25	2021-06-18	35.8	35.8	22.6	22.6	87	54	11.8	5.8	4.2	-	0	0	475.7
	2021-06-19	35.8	36.6	22.4	22.4	81	57	6.5	4.5	4	-	0	0	475.7
	2021-06-20	36.8	35.2	22.6	22.6	76	51	8.1	6.2	4.4	-	0	0	475.7
	2021-06-21	35.2	36	23.2	23.2	82	47	8.1	5.8	4.2	-	0	0	475.7
	2021-06-22	36	35.2	23	23	98	56	6.5	8	4.4	-	0	0	475.7
	2021-06-23	35.2	35	21.4	21.4	96	56	4.3	8.4	4.2	-	0	0	475.7
	2021-06-24	35.2	34	22	22	92	56	4.7	6.3	4.2	-	0	0	475.7
		35.7143	35.4	22.4571	22.4571	87.4286	53.8571	7.14286	6.42857	4.22857	-	0	0	475.7
26	2021-06-25	34	34.8	22	22	80	53	5.9	2.7	4	-	0	0	475.7
	2021-06-26	35	35.2	23.2	23.2	81	52	8.5	7	4.4	-	0	0	475.7
	2021-06-27	35.2	34.8	23.2	23.2	90	59	6.4	5.8	4.2	-	0	0	475.7
	2021-06-28	35	33.8	23.2	23.2	83	64	4.4	0.9	3.6	-	0	0	475.7
	2021-06-29	34.2	34	24	24	90	62	3	6.3	3.8	-	0	0	475.7
	2021-06-30	34.2	35.2	23.8	23.8	85	61	4	5.5	3.8	-	0	0	475.7
	2021-07-01	35.2	34.4	23.6	23.6	97	57	5.2	9.1	4.4	-	0	0	475.7
		34.6857	34.6	23.2857	23.2857	86.5714	58.2857	5.34286	5.32857	4.02857	-	0	0	475.7
27	2021-07-02	34.4	34.4	21.4	21.4	86	62	5.9	6.3	3.8	-	0	0	475.7
	2021-07-03	34.6	34.8	21.4	21.4	93	63	6.8	8.7	4.6	-	0	0	475.7
	2021-07-04	34.8	34.6	24.2	24.2	97	66	2.6	6.4	4.6	-	0	0	475.7
	2021-07-05	34.8	34.4	20.8	20.8	88	57	5.4	9.6	4	-	32.2	1	507.9
	2021-07-06	34.4	34.4	24	24	89	63	3	9.4	4.4	-	0	0	507.9
	2021-07-07	34.4	34.4	23.6	23.6	91	65	3.6	6.7	3.8	-	0	0	507.9
	2021-07-08	34.8	35	22.4	22.4	97	67	4.6	8.2	2	-	2.2	0	510.1
		34.6	34.5714	22.5429	22.5429	91.5714	63.2857	4.55714	7.9	3.88571	-	34.4	1	494.414
28	2021-07-09	35	34.2	21.8	21.8	95	67	5.7	7.8	0.8	-	3.2	1	513.3
	2021-07-10	34.6	34.6	21.8	21.8	84	71	6.8	0	3	-	4.8	1	518.1
	2021-07-11	34.6	34	23.2	23.2	87	79	14.1	0	3.4	-	0	0	518.1
	2021-07-12	34.8	34.8	23.2	23.2	85	64	10.5	0	3.6	-	0	0	518.1
	2021-07-13	34.8	35	24.6	24.6	83	68	10	0	2.8	-	0	0	518.1
	2021-07-14	35	34.8	23.6	23.6	78	64	9.8	1	3.4	-	0	0	518.1
	2021-07-15	35	34.8	22.2	22.2	96	67	8.1	5.2	3	-	6	1	524.1
		34.8286	34.6	22.9143	22.9143	86.8571	68.5714	9.28571	2	2.85714	-	14	3	518.271
29	2021-07-16	35	34.8	22	22	86	56	5.8	1.7	4	-	0	0	524.1
	2021-07-17	34.8	32.4	22.2	22.2	92	65	5.2	5.4	3.4	-	0	0	524.1
	2021-07-18	32	31	23.2	23.2	93	80	4.7	0.5	1.4	-	1.4	0	525.5
	2021-07-19	32	32.4	22.4	22.4	82	62	9.6	0.4	2.4	-	0	0	525.5
	2021-07-20	34.2	34	23.8	23.8	81	55	10.4	7	3.6	-	0	0	525.5
	2021-07-21	34	34.4	23.2	23.2	81	58	9.9	6	4.2	-	0	0	525.5
	2021-07-22	34.8	34	23.2	23.2	71	55	15.1	5.1	4.2	-	0	0	525.5
		33.8286	33.2857	22.8571	22.8571	83.7143	61.5714	8.67143	3.72857	3.31429	-	1.4	0	525.1
30	2021-07-23	34	33.4	23.2	23.2	82	70	16	5.1	4.2	-	0	0	525.5
	2021-07-24	33.8	33.6	24.2	24.2	85	65	10.2	1.3	3.8	-	0	0	525.5
	2021-07-25	34	34.4	23.2	23.2	91	62	9.2	6.1	4.2	-	0	0	525.5
	2021-07-26	34.4	34.8	22.6	22.6	83	55	9.4	8.6	4.6	-	0	0	525.5
	2021-07-27	34.8	34.8	23.2	23.2	81	53	8.4	8.3	4.8	-	0	0	525.5
	2021-07-28	35	34.8	22.6	22.6	76	53	9	8.6	4.8	-	0	0	525.5
	2021-07-29	34.8	34.8	22.4	22.4	75	54	10.8	8.2	4.8	-	0	0	525.5
		34.4	34.3714	23.0571	23.0571	81.8571	58.8571	10.4286	6.6	4.45714	-	0	0	525.5
31	2021-07-30	34.8	34.4	24.4	24.4	80	55	10	5.3	4.8	-	0	0	525.5
	2021-07-31	34.4	34.6	22.4	22.4	81	50	8.9	7.1	4.4	-	0	0	525.5
	2021-08-01	34.6	34	23	23	85	53	8.1	8.5	5	-	0	0	525.5
	2021-08-02	34.4	34.6	22.6	22.6	77	51	8.5	4.5	4.6	-	0	0	525.5
	2021-08-03	34.8	35.2	22.4	22.4	78	52	10.8	9.2	4.2	-	0	0	525.5
	2021-08-04	35.2	34.8	24	24	81	53	9.2	7.3	4.4	-	0	0	525.5
	2021-08-05	34.8	35	24.2	24.2	85	52	10.6	8	4.2	-	0	0	525.5
		34.7143	34.6571	23.2857	23.2857	81	52.2857	9.44286	7.12857	4.51429	-	0	0	525.5
32	2021-08-06	35	34.8	24	24	80	53	9.8	8.2	4	-	0	0	525.5
	2021-08-07	34.8	34	22.4	22.4	84	56	7.3	6.9	1.6	-	11.6	1	537.1
	2021-08-08	34.8	34.2	21.6	21.6	93	54	5.6	8.3	1.2	-	62.4	1	599.5
	2021-08-09	34.4	35	21.6	21.6	79	59	6.2	8.9	3.8	-	0	0	599.5
	2021-08-10	35.2	34.6	23.2	23.2	80	60	6.7	9.6	3.6	-	0	0	599.5
	2021-08-11	34.6	34	23.2	23.2	84	65	5.7	6.9	4	-	0	0	599.5
	2021-08-12	34..0	32	21.4	21.4	98	66	6.45	1.8	0.6	-	118.2	1	717.7
		34.8	34.0857	22.4857	22.4857	85.4286	59	6.82143	7.22857	2.68571	-	192.2	3	596.9
33	2021-08-13	32.4	33.2	23.4	23.4	90	60	5.9	1.8	2.8	-	0	0	717.7
	2021-08-14	32.2	33.4	23.2	23.2	85	63	5	2.7	3.8	-	0	0	717.7
	2021-08-15	33.4	33.2	22.4	22.4	90	61	6.2	0	1.4	-	3	1	720.7
	2021-08-16	32.2	33.8	22.4	22.4	81	57	5.8	2.3	3.2	-	0	0	720.7
	2021-08-17	34	33.8	22	22	92	66	4.9	2.8	1.4	-	9.4	1	730.1
	2021-08-18	33.8	31.4	21.4	21.4	95	72	5.4	5.6	1.4	-	69.4	1	799.5
	2021-08-19	31.4	33	21.8	21.8	82	61	7.3	2.4	1.4	-	2.6	1	802.1
		32.7714	33.1143	22.3714	22.3714	87.8571	62.8571	5.78571	2.51429	2.2	-	84.4	4	744.071
34	2021-08-20	33	33	23.4	23.4	90	79	6.1	7	3.8	-	0	0	802.1
	2021-08-21	32	33	23.6	23.6	92	81	2.4	0	3.4	-	0	0	802.1
	2021-08-22	33.2	32	22.2	22.2	93	77	2.9	1.4	3.2	-	0	0	802.1
	2021-08-23	33.2	27	22.2	22.2	92	92	2.8	2.4	1.4	-	6	1	808.1
	2021-08-24	27	32.4	22.8	22.8	92	71	2.9	0	3	-	0	0	808.1
	2021-08-25	32.4	33.4	22.2	22.2	93	61	6	6.7	3.4	-	0	0	808.1
	2021-08-26	33.4	34.4	23.2	23.2	90	58	6.8	8.2	4.2	-	0	0	808.1
		32.0286	32.1714	22.8	22.8	91.7143	74.1429	4.27143	3.67143	3.2	-	6	1	805.529
35	2021-08-27	34.4	31.8	24.8	24.8	92	68	5.8	7.8	4.2	-	0	0	808.1
	2021-08-28	32	33	23	23	98	73	5.7	5.5	4.2	-	0	0	808.1
	2021-08-29	33	33	22	22	78	70	6.1	0.9	4.2	-	0	0	808.1
	2021-08-30	33.2	33.8	23	23	77	51	13.7	3	4.2	-	0	0	808.1
	2021-08-31	33.8	35	23	23	78	53	6.5	4.5	4.2	-	0	0	808.1
	2021-09-01	34.2	34.4	23	23	92	64	4.5	5.8	3.4	-	0	0	808.1
	2021-09-02	34.6	32.2	21.4	21.4	98	65	4.2	1.4	1.2	-	30.2	1	838.3
		33.6	33.3143	22.8857	22.8857	87.5714	63.4286	6.64286	4.12857	3.65714	-	30.2	1	812.414
36	2021-09-03	34	31.8	20.2	20.2	100	68	5.9	3.2	1	-	44.6	1	882.9
	2021-09-04	31.8	30.4	20.2	20.2	91	71	6.1	2	1.4	-	1.6	0	884.5
	2021-09-05	30.8	33.4	21.2	21.2	89	66	5.9	0	3.4	-	0	0	884.5
	2021-09-06	33.4	33.2	23.2	23.2	84	69	9.2	8.3	3.8	-	0	0	884.5
	2021-09-07	33.2	33	23.2	23.2	79	63	9.1	1.3	3.8	-	0	0	884.5
	2021-09-08	33	34	22	22	81	62	6.9	8.6	4.2	-	0	0	884.5
	2021-09-09	34	34.6	22.4	22.4	82	59	6.8	9.7	4.4	-	0	0	884.5
		32.8857	32.9143	21.7714	21.7714	86.5714	65.4286	7.12857	4.72857	3.14286	-	46.2	1	884.271
37	2021-09-10	34.6	33.8	22.6	22.6	83	45	3.6	6.9	4.6	-	0	0	884.5
	2021-09-11	34.4	34.4	24.4	24.4	87	56	8.7	8	4.4	-	0	0	884.5
	2021-09-12	34.4	34.6	23.41	23.4	79	61	7.9	7.4	4.4	-	0	0	884.5
	2021-09-13	34.6	34.4	23.2	23.2	76	56	9	7.6	4	-	0	0	884.5
	2021-09-14	34.6	35.2	24.4	24.4	79	62	8.2	6.1	4.2	-	0	0	884.5
	2021-09-15	35.2	34.8	23.6	23.6	83	53	7.4	6.7	5	-	0	0	884.5
	2021-09-16	34.8	33.2	22.4	22.4	93	65	6.2	7.5	2.8	-	13.2	1	897.7
		34.6571	34.3429	23.43	23.4286	82.8571	56.8571	7.28571	7.17143	4.2	-	13.2	1	886.386
38	2021-09-17	33.2	34.8	23.2	23.2	89	58	4.7	7.8	4.2	-	0	0	897.7
	2021-09-18	34.8	32	23.2	23.2	93	79	5.1	7.3	4.2	-	0	0	897.7
	2021-09-19	33.2	31	23	23	77	72	2.2	4.7	4.2	-	0	0	897.7
	2021-09-20	31	32	20.2	20.2	98	62	4.3	6.1	2.4	-	5.2	1	902.9
	2021-09-21	32.2	33.8	22.2	22.2	93	63	4.2	6	3.8	-	0	0	902.9
	2021-09-22	34.2	33.2	22.2	22.2	89	63	5.1	4.5	4.4	-	0	0	902.9
	2021-09-23	33.2	34.6	22.2	22.2	87	61	3.7	6	4.6	-	0	0	902.9
		33.1143	33.0571	22.3143	22.3143	89.4286	65.4286	4.18571	6.05714	3.97143	-	5.2	1	900.671
39	2021-09-24	34.6	34.6	22	22	93	61	5.2	7	2.4	-	6	1	908.9
	2021-09-25	34.6	32.2	22.2	22.2	81	71	5.9	5.8	3.8	-	0	0	908.9
	2021-09-26	34	34.8	22.2	22.2	92	74	6.7	3.7	2.8	-	7.2	1	916.1
	2021-09-27	34.8	33.2	22.2	22.2	92	58	4.2	3.8	4	-	0	0	916.1
	2021-09-28	33.2	34.8	22.2	22.2	83	56	11.8	6.7	4.4	-	0	0	916.1
	2021-09-29	34.8	35.4	23	23	77	56	6.8	4.7	4.2	-	0	0	916.1
	2021-09-30	35.4	33	22.2	22.2	90	67	5.1	4.9	3.8	-	0	0	916.1
		34.4857	34	22.2857	22.2857	86.8571	63.2857	6.52857	5.22857	3.62857	-	13.2	2	914.043
40	2021-10-01	33	29	23	23	93	92	5.5	5.7	4.4	-	0	0	916.1
	2021-10-02	30	33	23	23	97	84	3.1	4.8	4.2	-	0	0	916.1
	2021-10-03	33	32	22.4	22.4	93	77	6.2	4	4.2	-	0	0	916.1
	2021-10-04	32	31.4	23	23	93	72	3	4.3	3.6	-	0	0	916.1
	2021-10-05	31.8	31.8	24.2	24.2	97	100	3.1	2.8	0.4	-	3	1	919.1
	2021-10-06	31.8	32	21.4	21.4	98	91	3.4	0	0	-	52	1	971.1
	2021-10-07	33	32.8	23	23	97	71	3	3.5	3.4	-	0	0	971.1
		32.0857	31.7143	22.8571	22.8571	95.4286	83.8571	3.9	3.58571	2.88571	-	55	2	932.243
41	2021-10-08	33	33	24.2	24.2	92	71	8.1	3.9	4	-	0	0	971.1
	2021-10-09	33	31	20.2	20.2	100	72	7.3	6.3	3.4	-	42.2	1	1013.3
	2021-10-10	32	33.2	20.2	20.2	90	62	6.3	6.2	4	-	0	0	1013.3
	2021-10-11	33.2	32	21.6	21.6	95	69	5.7	6.5	1.4	-	3.2	1	1016.5
	2021-10-12	32	32	21.4	21.4	98	72	6.3	6.9	3	-	70	1	1086.5
	2021-10-13	32	33	22.2	22.2	88	63	7.4	8.2	4	-	3.4	1	1089.9
	2021-10-14	33	33	20.2	20.2	100	66	5.6	8.3	2.2	-	22.2	1	1112.1
		32.6	32.4571	21.4286	21.4286	94.7143	67.8571	6.67143	6.61429	3.14286	-	141	5	1043.24
42	2021-10-15	33	32.6	20.4	20.4	85	73	4.6	7.8	3.6	-	0	0	1112.1
	2021-10-16	32.6	33.2	20.2	20.2	86	66	5.5	5.7	4.2	-	0	0	1112.1
	2021-10-17	33.2	32.2	20.2	20.2	87	65	6.6	6.8	2.6	-	3.4	1	1115.5
	2021-10-18	32.4	33.6	23.2	23.2	83	61	6.4	2.2	4	-	0	0	1115.5
	2021-10-19	33.6	33.2	23.4	23.4	87	67	6.2	7.9	4.6	-	0	0	1115.5
	2021-10-20	33.2	32	23.2	23.2	85	94	3.3	8.2	4.6	-	0	0	1115.5
	2021-10-21	33	33	23	23	93	98	2.1	5.1	1.8	-	3	1	1118.5
		33	32.8286	21.9429	21.9429	86.5714	74.8571	4.95714	6.24286	3.62857	-	6.4	2	1114.96
43	2021-10-22	33	33	22.2	22.2	94	86	2.1	5.4	3.4	-	48.2	1	1166.7
	2021-10-23	34	32	23.2	23.2	92	70	3.1	7.6	3.4	-	0	0	1166.7
	2021-10-24	32	32	22.2	22.2	92	78	2.8	3	4.4	-	0	0	1166.7
	2021-10-25	32.2	31.8	21.2	21.2	84	74	4.3	3.8	4.2	-	0	0	1166.7
	2021-10-26	31.8	32.4	21.2	21.2	93	73	4.6	7.8	4.2	-	0	0	1166.7
	2021-10-27	32.4	33	21.2	21.2	92	67	1.9	6.3	4.2	-	0	0	1166.7
	2021-10-28	33	31	21.2	21.2	92	82	6.3	8	4	-	0	0	1166.7
		32.6286	32.1714	21.7714	21.7714	91.2857	75.7143	3.58571	5.98571	3.97143	-	48.2	1	1166.7
44	2021-10-29	31	29	20.2	20.2	98	86	2.4	0	1.2	-	37.2	1	1203.9
	2021-10-30	31	29.2	21.8	21.8	98	85	2	0.1	1	-	28.2	1	1232.1
	2021-10-31	30	30	21.8	21.8	100	84	9.5	4.7	2.8	-	29	1	1261.1
	2021-11-01	30.2	30.2	21	21	92	95	5.3	0	1.8	-	27.8	1	1288.9
	2021-11-02	30.2	31	22	22	100	86	4.9	2.6	2.2	-	44.2	1	1333.1
	2021-11-03	31	30.2	21.6	21.6	100	100	6.5	2.5	1.2	-	77.2	1	1410.6
	2021-11-04	30.2	30.2	21.2	21.2	98	89	2.6	0	2.6	-	7.8	1	1418.1
		30.5143	29.9714	21.3714	21.3714	98	89.2857	4.74286	1.41429	1.82857	-	251.4	7	1306.83
45	2021-11-05	30.2	30.2	21	21	98	85	3.4	0.3	1.6	-	0	0	1418.1
	2021-11-06	31.8	30.2	21.2	21.2	100	78	3.4	6.6	3.4	-	27.8	1	1445.9
	2021-11-07	30.2	29	22.2	22.2	92	94	4	3.5	2.4	-	0	0	1445.9
	2021-11-08	29	26	21	21	100	93	6	0	0.2	-	26.2	1	1472.1
	2021-11-09	26	28	21	21	97	100	5.2	0	0.5	-	4.2	1	1476.3
	2021-11-10	28	29	21.2	21.2	100	85	3.4	0	0.2	-	142.2	1	1618.5
	2021-11-11	29	26	21.4	21.4	88	90	11.9	0	0	-	3	0	1621.5
		29.1714	28.3429	21.2857	21.2857	96.4286	89.2857	5.32857	1.48571	1.18571	-	203.4	4	1499.76
46	2021-11-12	26	27	20.4	20.4	98	92	6.4	0	0.6	-	2	0	1623.5
	2021-11-13	27	30.2	22.2	22.2	98	84	3.8	0	0.4	-	0	0	1623.5
	2021-11-14	30.2	29	22	22	100	92	1.9	0	0	-	0.8	0	1624.3
	2021-11-15	29	28.4	21	21	95	92	3.2	0	0.5	-	12.1	1	1636.4
	2021-11-16	28	29	21.4	21.4	98	87	3.3	0	0.3	-	10.1	1	1646.5
	2021-11-17	29	28	21.4	21.4	100	92	3	0	0	-	4.1	1	1650.6
	2021-11-18	28	27.2	20.2	20.2	100	92	6	0	0	-	46.2	1	1696.8
		28.1714	28.4	21.2286	21.2286	98.4286	90.1429	3.94286	0	0.257143	-	75.3	4	1643.09
47	2021-11-19	27.4	30.2	20.2	20.2	90	84	8.4	0	0.4	-	4.8	1	1701.6
	2021-11-20	30.2	30	20.2	20.2	93	82	4.6	0	0.8	-	5.2	1	1706.8
	2021-11-21	30	31	20.4	20.4	94	80	4.2	7.7	0.9	-	10.1	1	1716.9
	2021-11-22	31	28.4	20.2	20.2	98	91	2.6	7.2	2.6	-	0	0	1716.9
	2021-11-23	28.6	30.2	20.2	20.2	92	78	4	2.9	2.4	-	2.6	1	1719.5
	2021-11-24	30.2	27.4	20.2	20.2	100	91	5.6	5.5	2.6	-	0	0	1719.5
	2021-11-25	27.4	28.4	20.2	20.2	98	95	3.8	0	1.2	-	15.2	1	1734.7
		29.2571	29.3714	20.2286	20.2286	95	85.8571	4.74286	3.32857	1.55714	-	37.9	5	1716.56
48	2021-11-26	28.4	28.2	20.2	20.2	100	87	7.3	3.1	1	-	63.4	1	1798.1
	2021-11-27	28.2	27.2	20	20	98	85	6.6	7.1	0.4	-	42.4	1	1840.5
	2021-11-28	28	27.4	20.2	20.2	100	94	5.5	0	0.6	-	60.6	1	1901.1
	2021-11-29	27.4	27	20.2	20.2	100	88	5.2	0	0	-	45.4	1	1946.5
	2021-11-30	27	30.2	20	20	98	80	4.5	0	1	-	0	0	1946.5
	2021-12-01	30.2	27	21.4	21.4	93	94	5.5	8.5	1.8	-	1	0	1947.5
	2021-12-02	27	29.8	21.2	21.2	98	73	4.1	3.9	3.4	-	10.2	1	1957.7
		28.0286	28.1143	20.4571	20.4571	98.1429	85.8571	5.52857	3.22857	1.17143	-	223	5	1905.41
49	2021-12-03	29.8	29.4	21	21	98	71	4.5	5	3.8	-	0	0	1957.7
	2021-12-04	30	31	21.6	21.6	94	78	2.8	3.1	3.2	-	0	0	1957.7
	2021-12-05	31	32.4	21.6	21.6	98	71	1.5	4.8	3.6	-	0	0	1957.7
	2021-12-06	32.4	30.2	21.4	21.4	98	77	2.8	7.9	4.2	-	0	0	1957.7
	2021-12-07	30.2	30.4	23.2	23.2	93	71	0.7	3.2	4.4	-	0	0	1957.7
	2021-12-08	30.4	30	21.8	21.8	97	84	4.1	5.9	3.8	-	0	0	1957.7
	2021-12-09	30	29	21.8	21.8	94	81	4.6	4.8	3.8	-	12.4	1	1970.1
		30.5429	30.3429	21.7714	21.7714	96	76.1429	3	4.95714	3.82857	-	12.4	1	1959.47
50	2021-12-10	29	30.2	21.6	21.6	92	71	4.7	4.5	3.4	-	0	0	1970.1
	2021-12-11	30.2	29.8	21	21	98	76	4.1	7.9	3.6	-	0	0	1970.1
	2021-12-12	29.8	29.2	20.2	20.2	78	72	10.2	6.5	2.8	-	11.8	1	1981.9
	2021-12-13	29.2	29.8	21.2	21.2	98	75	3.9	5.8	2.4	-	0	0	1981.9
	2021-12-14	29.6	27	20.2	20.2	98	93	6.5	6.1	2.6	-	7.8	1	1989.7
	2021-12-15	28	29	20.4	20.4	98	88	5.2	3.2	1.8	-	2.1	0	1991.8
	2021-12-16	29	29	21.2	21.2	93	78	6.4	7.7	3	-	0	0	1991.8
		29.2571	29.1429	20.8286	20.8286	93.5714	79	5.85714	5.95714	2.8	-	21.7	2	1982.47
51	2021-12-17	29.2	29.2	19.8	19.8	87	70	6.2	1.8	2.8	-	0	0	1991.8
	2021-12-18	29.2	26	19	19	90	88	6.8	5.7	2.8	-	0	0	1991.8
	2021-12-19	29	29	19	19	100	77	7	6.5	3	-	0	0	1991.8
	2021-12-20	29.2	29.2	18.2	18.2	89	69	6	6.6	3	-	0	0	1991.8
	2021-12-21	29.2	28.8	18.2	18.2	97	67	5.7	7	3	-	0	0	1991.8
	2021-12-22	29	29.2	18	18	98	65	4.8	6.4	3.4	-	0	0	1991.8
	2021-12-23	29.2	29.2	17	17	96	66	3.5	5.3	3.6	-	0	0	1991.8
		29.1429	28.6571	18.4571	18.4571	93.8571	71.7143	5.71429	5.61429	3.08571	-	0	0	1991.8
52	2021-12-24	27.2	29	16.4	16.4	95	66	3.5	6.8	3.6	-	0	0	1991.8
	2021-12-25	29	28.8	16	16	100	74	3.3	7	3.4	-	0	0	1991.8
	2021-12-26	28.8	28.4	17	17	96	73	3.4	7.5	3.2	-	0	0	1991.8
	2021-12-27	28.6	28.2	18.2	18.2	98	78	4.2	7.3	3.4	-	0	0	1991.8
	2021-12-28	28.4	28.2	19.2	19.2	93	71	4.6	7.2	3.8	-	0	0	1991.8
	2021-12-29	28.2	28.2	18.8	18.8	100	78	3.3	4.1	3.2	-	0	0	1991.8
	2021-12-30	28.4	28.4	18.8	18.8	92	76	5.2	5.3	3	-	0	0	1991.8
		28.3714	28.4571	17.7714	17.7714	96.2857	73.7143	3.92857	6.45714	3.37143	-	0	0	1991.8
53	2021-12-31	28.4	28.4	19	19	96	74	7	2.7	2	-	22.2	1	2014
		28.4531	28.3224	18.3959	18.3959	95.898	74.8163	4.51837	5.79388	3.13878	-	22.2	1	1994.97

## Sheet:  Std wk 21
		Week	Temp 0C				RH (%)		W.V	SS	Eva	Radiation	Rainfall	RD	Since
			Max 0C		Min 0C
			I	II	I	II	I	II	(km/h)	Hours	mm	cal/ cm2	(mm)
		1	27.0571	27.0857	20.5143	20.5143	94.1429	88.8571	4.87143	2.08571	0.585714	320.41	115.7	5	27.3
		2	27.8286	27.2	20.2857	20.2857	97.7143	89.5714	4.98571	1.38571	0.442857	334.336	237.7	5	210.914
		3	27.8857	28.4	20.4	20.4	96.1429	78	4.18571	3.97143	0.742857	449.714	31.2	2	382.743
		4	30.3714	30.0571	20.0286	20.0286	95	69.8571	3.5	6.65714	1.65714	581.007	0	0	384.6
		5	30.2	28.5143	18.7429	18.7429	84.4286	69.5714	5.61429	6.81429	1.82857	597.717	0	0	384.6
		6	30.4	30.3429	18.3429	18.3429	95.1429	61.5714	6.11429	8.15714	2.11429	653.417	0	0	384.6
		7	31.7714	31.8286	17.0571	17.0571	92.7143	62.4286	4.98571	8.61429	2.74286	642.674	0	0	384.6
		8	32.0429	29.9429	20.1143	20.1143	94.7143	75.7143	5.92857	3.95714	1.58571	567.081	17.5	3	395.743
		9	32.7143	32.5429	18.9429	18.9429	94.8571	59.5714	3.75714	7.54286	2.23333	676.041	0	0	402.1
		10	33.8857	34.1429	20.3714	20.3714	95.1429	49.2857	5.68571	8.52857	2.68571	685.999	0	0	402.1
		11	34.1429	34.0286	19.9143	19.9143	90.1429	53	5.12857	8.18571	3.22857	-	0	0	402.1
		12	34.4	34.4571	20.1714	20.1714	94.1429	52.7143	4.82857	6.9	4.17143	-	0	0	402.1
		13	35.6571	36.4	22.8571	22.8571	93.5714	51.5714	5.44286	6.72857	4.05714	-	0	0	402.1
		14	36.8571	36.7714	23.2857	23.2857	92.4286	49.5714	5.69286	7.25714	3.54286	-	0	0	402.1
		15	35.1143	34.1714	22.7429	22.7429	92.1429	61.5714	3.75714	5.45714	3.22857	-	17.6	1	405.643
		16	35.3429	36	24.2286	24.2286	92.1429	50.7143	4.30714	6.42857	4.08571	-	0	0	419.7
		17	36.5143	36.5143	24.7429	24.7429	92.2857	50.5714	3.52857	7.91429	4.24286	-	0	0	419.7
		18	36.8571	36.6857	24.1429	24.1429	89.5714	63.5714	3.97143	7.61429	4.45714	-	0	0	404.614
		19	34.2286	35.7429	24	24	84.1429	63.1429	4.65714	8.05714	4.42857	-	0	0	402.757
		20	36.0571	36.3429	23.0857	23.0857	86.8571	62.2857	5.32857	7.54286	3.98571	-	10.1	1	423.329
		21	35.8571	35.6857	22.7143	22.7143	83.7143	54.7143	7.32857	3.4	3.68571	-	0	0	429.8
		22	36.0286	36.2571	22.0571	22.0571	79.5714	55.1429	6.49286	7.87143	4.2	-	21.2	1	441.914
		23	34.9714	34.7714	23	23	89.7143	60	5.7	6.18571	3.16667	-	15.4	2	460.971
		24	35.3429	35.2571	23.8286	23.8286	91	52.2857	10.9143	5.57143	3.81429	-	9.3	1	473.043
		25	35.7143	35.4	22.4571	22.4571	87.4286	53.8571	7.14286	6.42857	4.22857	-	0	0	475.7
		26	34.6857	34.6	23.2857	23.2857	86.5714	58.2857	5.34286	5.32857	4.02857	-	0	0	475.7
		27	34.6	34.5714	22.5429	22.5429	91.5714	63.2857	4.55714	7.9	3.88571	-	34.4	1	494.414
		28	34.8286	34.6	22.9143	22.9143	86.8571	68.5714	9.28571	2	2.85714	-	14	3	518.271
		29	33.8286	33.2857	22.8571	22.8571	83.7143	61.5714	8.67143	3.72857	3.31429	-	1.4	0	525.1
		30	34.4	34.3714	23.0571	23.0571	81.8571	58.8571	10.4286	6.6	4.45714	-	0	0	525.5
		31	34.7143	34.6571	23.2857	23.2857	81	52.2857	9.44286	7.12857	4.51429	-	0	0	525.5
		32	34.8	34.0857	22.4857	22.4857	85.4286	59	6.82143	7.22857	2.68571	-	192.2	3	596.9
		33	32.7714	33.1143	22.3714	22.3714	87.8571	62.8571	5.78571	2.51429	2.2	-	84.4	4	744.071
		34	32.0286	32.1714	22.8	22.8	91.7143	74.1429	4.27143	3.67143	3.2	-	6	1	805.529
		35	33.6	33.3143	22.8857	22.8857	87.5714	63.4286	6.64286	4.12857	3.65714	-	30.2	1	812.414
		36	32.8857	32.9143	21.7714	21.7714	86.5714	65.4286	7.12857	4.72857	3.14286	-	46.2	1	884.271
		37	34.6571	34.3429	23.43	23.4286	82.8571	56.8571	7.28571	7.17143	4.2	-	13.2	1	886.386
		38	33.1143	33.0571	22.3143	22.3143	89.4286	65.4286	4.18571	6.05714	3.97143	-	5.2	1	900.671
		39	34.4857	34	22.2857	22.2857	86.8571	63.2857	6.52857	5.22857	3.62857	-	13.2	2	914.043
		40	32.0857	31.7143	22.8571	22.8571	95.4286	83.8571	3.9	3.58571	2.88571	-	55	2	932.243
		41	32.6	32.4571	21.4286	21.4286	94.7143	67.8571	6.67143	6.61429	3.14286	-	141	5	1043.24
		42	33	32.8286	21.9429	21.9429	86.5714	74.8571	4.95714	6.24286	3.62857	-	6.4	2	1114.96
		43	32.6286	32.1714	21.7714	21.7714	91.2857	75.7143	3.58571	5.98571	3.97143	-	48.2	1	1166.7
		44	30.5143	29.9714	21.3714	21.3714	98	89.2857	4.74286	1.41429	1.82857	-	251.4	7	1306.83
		45	29.1714	28.3429	21.2857	21.2857	96.4286	89.2857	5.32857	1.48571	1.18571	-	203.4	4	1499.76
		46	28.1714	28.4	21.2286	21.2286	98.4286	90.1429	3.94286	0	0.257143	-	75.3	4	1643.09
		47	29.2571	29.3714	20.2286	20.2286	95	85.8571	4.74286	3.32857	1.55714	-	37.9	5	1716.56
		48	28.0286	28.1143	20.4571	20.4571	98.1429	85.8571	5.52857	3.22857	1.17143	-	223	5	1905.41
		49	30.5429	30.3429	21.7714	21.7714	96	76.1429	3	4.95714	3.82857	-	12.4	1	1959.47
		50	29.2571	29.1429	20.8286	20.8286	93.5714	79	5.85714	5.95714	2.8	-	21.7	2	1982.47
		51	29.1429	28.6571	18.4571	18.4571	93.8571	71.7143	5.71429	5.61429	3.08571	-	0	0	1991.8
		52	28.3714	28.4571	17.7714	17.7714	96.2857	73.7143	3.92857	6.45714	3.37143	-	0	0	1991.8
		53	28.4531	28.3224	18.3959	18.3959	95.898	74.8163	4.51837	5.79388	3.13878	-	22.2	1	1994.97
													2014	78
